1 **Sialylation of Asparagine 612 inhibits Aconitase activity during mouse sperm capacitation;**  
2 **A possible mechanism for the switch from oxidative phosphorylation to glycolysis.**

3 Ana Izabel Silva Balbin Villaverde<sup>1</sup>, Rachel Ogle<sup>1</sup>, Peter Lewis<sup>2</sup>, Louise Hetherington<sup>1</sup>, Vince  
4 Carbone<sup>3</sup> Tony Velkov<sup>4</sup>, Jacob Netherton<sup>1</sup>, Mark A. Baker<sup>1</sup>

5 <sup>1</sup> Priority Research Centre in Reproductive Science, School of Environmental and Life Sciences,  
6 University of Newcastle, Callaghan, NSW, Australia

7 <sup>2</sup> Centre for Chemical Biology and Clinical Pharmacology, Department of Biology, School of  
8 Environmental & Life Sciences, The University of Newcastle, Callaghan

9 <sup>3</sup>AgResearch, Grasslands Research Centre, Tennent Drive, Private Bag 11008, Palmerston  
10 North 4442, New Zealand.

11 <sup>4</sup>Faculty of Pharmacy and Pharmaceutical Sciences, Monash University, NSW, Australia

12

13 This work was supported by the Brazilian National Council for Scientific and Technological  
14 Development (CNPq).

15

16 Correspondence: Mark A. Baker, Priority Research Centre in Reproductive Science, School of  
17 Environmental and Life Sciences, University of Newcastle, Callaghan, NSW 2308, Australia.

18 Tel: +61 2 4921 6143: Fax: +61 2 4921 6308 E-mail: [Mark.Baker@newcastle.edu.au](mailto:Mark.Baker@newcastle.edu.au)

19

20

## 21 **Abstract**

22 After ejaculation, mammalian spermatozoa must undergo a process known as capacitation in order  
23 to successfully fertilize the oocyte. Several post-translational modifications occur during  
24 capacitation, including sialylation, which despite being limited to a few proteins, seems to be  
25 essential for proper sperm-oocyte interaction. Regardless of its importance, to date, no single study  
26 has ever identified nor quantified which glycoproteins bearing terminal sialic acid (Sia) are altered  
27 during capacitation. Here we characterize sialylation during mouse sperm capacitation. Using  
28 tandem mass spectrometry coupled with liquid chromatography (LC-MS/MS), we found 142 non-  
29 reductant peptides, with 9 of them showing potential modifications on their sialylated  
30 oligosaccharides during capacitation. As such, N-linked sialoglycopeptides from C4b-binding  
31 protein, endothelial lipase (EL), serine proteases 39 and 52, testis-expressed protein 101 and  
32 zonadhesin were reduced following capacitation. In contrast, mitochondrial aconitate hydratase  
33 (aconitase; ACO2) was the only protein to show an increase in Sia content during capacitation.  
34 Interestingly, while the loss of Sia within EL (N62) was accompanied by a reduction in its  
35 phospholipase A<sub>1</sub> activity, the increase of sialylation in the ACO2 (N612) also resulted in a  
36 decrease of the activity of this TCA cycle enzyme. The latter was confirmed by N612D  
37 recombinant protein with both His and GFP tag, in which the N612D mutant had no activity  
38 compared to WT when protein. Computer modelling show that N612 sits atop the catalytic site of  
39 ACO2. The introduction of sialic acid causes a large conformation change in the alpha helix,  
40 essentially, distorting the active site, leading to complete loss of function. These findings suggest  
41 that the switch from oxidative phosphorylation, over to glycolysis that occurs during capacitation  
42 may come about through sialylation of ACO2.

43 **Keywords:** glycoproteins, sialic acid, titanium dioxide, LC-MS/MS, endothelial lipase.

44 **Abbreviations:** acetonitrile (ACN), asparagine (Asn), dibutyryl-cAMP (dbcAMP), endothelial  
45 lipase (EL), liquid chromatography tandem-mass spectrometry (LC-MS/MS), mass spectrometry  
46 (MS), meprin/A5 antigen/mu receptor tyrosine phosphatase (MAM), mitochondrial aconitate  
47 hydratase (ACO2), peptide-N-glycosidase F (PNGase F), phospholipase A<sub>1</sub> (PLA<sub>1</sub>), phospholipase  
48 A<sub>1</sub> selective substrate (PED-A<sub>1</sub>), serine (Ser), sialic acid (Sia), threonine (T), Aspartic acid (D),  
49 titanium dioxide (TiO<sub>2</sub>), tricarboxylic acid (TCA), trifluoroacetic acid (TFA), wild-type ACO2  
50 transfected (WT).

51

## 52 **Introduction**

53 Sperm capacitation is a phenomenon first described by Chang, who demonstrated that freshly  
54 ejaculated spermatozoa are unable to fertilize the oocyte immediately [1]. Rather, a period within  
55 the female reproductive tract was required [1]. During this period, it is evident that spermatozoa  
56 undergo a series of biochemical and metabolic changes to become fully capable of fertilizing the  
57 egg [2-4]. From a metabolic perspective, Fraser and Lane first described the phenomenon of a  
58 metabolic switch that occurs during capacitation [5]. In this context, freshly ejaculated  
59 spermatozoa have high rates of oxygen consumption, however, during *in vitro* capacitation, mouse  
60 spermatozoa decrease their reliance on oxidative phosphorylation and switch over to a glycolytic  
61 pathway [5]. Using different metabolic substrates, this “switch” was shown to be necessary to  
62 achieve fertilization [5]. In addition, the reliance on glycolysis explain why sperm-specific  
63 glycolytic knockout mice, including GADPH [6], are infertile due to poor motility. From a  
64 biochemical perspective, it is unknown how sperm make this switch. However, considering that

65 spermatozoa are transcriptionally and translationally silent, with the exception of mitochondrial  
66 proteins [7], we reasoned that post-translational modifications of existing proteins would likely  
67 play a role [8].

68 Whilst the role of phosphorylation in sperm capacitation is well studied [9-11], few studies have  
69 looked at the specific role of protein glycosylation. The latter is characterized by the addition of  
70 oligosaccharide side chains via a covalent linkage either at the asparagine (Asn) residue (N-linked)  
71 or at the serine/threonine (Ser/Thr) residues (O-linked). There are a number of variations in terms  
72 of glycan structures, which is translated in a wide range of biological functions [12, 13]. Notably,  
73 terminal sugar sequences are among the features suggested as mediators of more specific roles  
74 [12]. In this context, sialic acid (Sia), a monosaccharide with a nine-carbon backbone and  
75 negatively charged, is considered an important terminal sugar.

76 The presence of Sia residues in glycoconjugates at the sperm surface seems to be vital for the  
77 success of fertilization. Indeed, in both humans [14] and boars [15] with unexplained infertility or  
78 subfertility, a decreased affinity for the lectin wheat germ agglutinin (WGA) has been reported,  
79 suggesting either N-acetyl glucosamine and Sia residues are lacking within these cells.  
80 Interestingly, surface Sia residues have also been shown to help sperm to survive and migrate  
81 inside the female reproductive tract by reducing their phagocytosis and antigenicity [16-18] and  
82 by helping them to penetrate the cervical mucus [19]. During sperm capacitation, it has been  
83 suggested that Sia residues are shed from the surface of spermatozoa. In this context, studies using  
84 lectin binding [20-23], surface charge determination [24, 25] radiolabeling of terminal sialyl  
85 residues [26] and HPLC measurement following acid hydrolysis [27] have all indicated that  
86 surface sialoglycoconjugates are probably lost or modified when spermatozoa are incubated under  
87 capacitating conditions. One model that has been put forward is that the shedding of Sia residues

88 may be triggered by the release of neuraminidases present at the sperm surface [27]. If this is the  
89 case, then the presence of oviduct fluid components [21] heparin [22] and/or albumin [28] in the  
90 medium probably facilitate this release [27].

91 Despite the data that show changes in sperm sialylation content during capacitation, no single  
92 publication has ever look at which proteins are sialylated in spermatozoa, yet alone quantified their  
93 levels during capacitation. With this in mind, we used titanium dioxide (TiO<sub>2</sub>) followed by peptide-  
94 N-glycosidase F (PNGase F) cleavage to search for N-linked Sia-containing peptides and to  
95 quantify them during *in vitro* capacitation of mouse sperm. In addition, we further studied both  
96 mitochondrial aconitate hydratase (aconitase; ACO2) and endothelial lipase (EL) proteins to  
97 demonstrate a biologically meaningful effect of the Sia residue during sperm capacitation.

98

## 99 **Material and Methods**

### 100 *Materials*

101 Chemicals were purchased from Sigma-Aldrich at highest research grade with the exception of the  
102 following products. Chloroform was purchased from Fronine (Riverstone, NSW, Australia). The  
103 2-D quant kit was from G.E. Healthcare (Castle Hill, NSW, Australia). BCA assay kit was from  
104 Quantum Scientific (Pierce, Milton, QLD, Australia). HEPES was from Invitrogen Australia  
105 (Melbourne, VIC, Australia). Sequencing grade trypsin was supplied by Promega (Alexandria,  
106 NSW, Australia). Antarctic phosphatase and PNGase F were purchased from New England  
107 Biolabs (Arundel, QLD, Australia). Phospholipase A<sub>1</sub> selective substrate (PED-A<sub>1</sub>) (N-((6-(2,4-  
108 DNP)Amino)Hexanoyl)-1-(BODIPY® FL C5)-2-Hexyl-Sn-Glycero-3-Phosphoethanolamine)  
109 was purchased from Molecular Probes (Melbourne, VIC, Australia). The TiO<sub>2</sub> was collected from

110 a disassembled column. Ionophore A23187 was purchased from Calbiochem (EMD Biosciences,  
111 La Jolla, USA).

112

### 113 *Sperm collection and in vitro capacitation*

114 Animal use was approved by institutional and New South Wales State Government ethics  
115 committees. Adult Swiss mice (~8-10 weeks) were euthanized and the epididymides were  
116 removed. Sperm cells were recovered from the cauda of the epididymides using retrograde  
117 flushing [29, 30] and then incubated for 10 min at 37°C in 0.3% BSA BWW media to allow cell  
118 dispersion [31]. For the non-capacitated group, sodium bicarbonate was replaced by sodium  
119 chloride in the BWW media. Pentoxifylline and dibutyryl-cAMP (dbcAMP) were added only in  
120 the capacitated group at a final concentration of 1mM each. All samples were incubated for 60 min  
121 at 37°C and then sperm cells were washed three times (300 x g, 3 min) using BWW media without  
122 BSA.

123

### 124 *Protein extraction and sialoglycopeptide enrichment*

125 Sperm pellets were resuspended in a lysis buffer consisting of 1% (w/v) C7BzO [3-(4-Heptyl)  
126 phenyl-3-hydroxypropyl) dimethylammoniopropanesulfonate], 7 M urea, 2 M thiourea, and 40  
127 mM Tris (pH 10.4) at a final concentration of  $\sim 2.5 \times 10^6 / 100 \mu\text{L}$  and incubated for 1 h (4°C) with  
128 constant rotation. Supernatant (18,000 x g, 15 min, 4°C) was recovered and total protein was  
129 quantified using a 2-D quant kit following manufacture's protocol. Proteins were reduced (10 mM  
130 DTT, 30 min, 30°C), alkylated (45 mM iodoacetamide, 30 min, 30°C) and 250  $\mu\text{g}$  of protein was

131 precipitated using methanol and chloroform [32]. Samples were incubated overnight (37°C) with  
132 trypsin at a 1:50 (trypsin/protein) ratio. Proteases were inactivated (bath sonication, 15 minutes)  
133 and peptides were treated with alkaline phosphatase (20 U, 2 hours, 30°C).

134 Enrichment of glycopeptides containing terminal Sia was performed as previously described [33].  
135 In brief, peptide samples were diluted in loading buffer [1 M glycolic acid, 80% (v/v) ACN, 5%  
136 (v/v) TFA] and then applied to TiO<sub>2</sub> beads (2 mg). After incubation for 1 h, TiO<sub>2</sub> beads were  
137 washed [washing buffer 1; 80% (v/v) ACN, 1% (v/v) TFA, and washing buffer 2; 20% (v/v) ACN,  
138 0.1% (v/v) TFA] and dried in a vacuum concentrator. Enzymatic deglycosylation of N-linked  
139 sialoglycopeptides was performed with 1 µL of PNGase F for 3h at 37°C. Released peptides were  
140 recovered, dried, resuspended in 0.1% (v/v) TFA and then loaded on a LC-MS (AmaZon ETD Ion  
141 Trap; Bruker Daltonik, Bremen, Germany) with an online-nanosprayer, and run as previously  
142 described [34].

143

#### 144 *Bioinformatics*

145 Acquired CID spectra were processed in DataAnalysis 4.0; deconvoluted spectra were further  
146 analyzed with BioTools 3.2 software and submitted to Mascot database search (Mascot 2.2.04,  
147 Swissprot database (546439 sequences; 194445396 residues, release date 19/20/14)). The  
148 following variable modifications have been used: phosphorylation (STY), carbamidomethylation  
149 (C), deamidation (NQ) and oxidation (M). To identify N-linked glycosylation sites, a deamidated  
150 Asn residue had to be flanked by the glycosylation consensus motif (NXS/T, where X is any amino  
151 acid besides proline) which was manually validated. Peptides that were assigned a deamidation  
152 event based solely on the MS data (i.e., no y- or b- fragment ion for a particular deamidated Asn

153 residue could be detected) were presumed to be glycosylated only if a canonical N-glycan motif  
154 was present.

155 The derived mass spectrometry datasets on the 3D-trap system were combined into protein  
156 compilations using the ProteinExtractor functionality of Proteinscape 2.1.0 573 (Bruker Daltonics,  
157 Bremen, Germany). In order to exclude false positive identifications, peptides with Mascot scores  
158 below 40 were rejected. Peptides with a mascot score above 40 were manually validated in  
159 BioTools (Bruker Daltonics, Bremen, Germany) on a residue-by residue basis using the raw data  
160 to ensure accuracy as previously described [33]

161

#### 162 *Peptide label-free quantification*

163 MS-based label-free quantification of the N-glycopeptides identified was performed using the  
164 software Data Analysis 4.1 (Bruker Daltonik GmbH, Bremen, Germany). Peptides were matched  
165 based on charge state, m/z value and elution time. The match was confirmed by visual inspection  
166 of the peptide on the survey view and by manual comparison of the MS/MS spectra if available.  
167 Relative peptide quantification was carried out by integrating the area of the extracted ion  
168 chromatograms (XIC) of the monoisotopic peak from MS spectra (Fig. 1) [33]. For peptide  
169 quantification, four biological replicates, each consisting of pooled samples from 3-4 mice, were  
170 run.

171

172

173



174 *PLA<sub>1</sub> activity assay*

175 The phospholipase A<sub>1</sub> (PLA<sub>1</sub>) activity of EL in intact mouse spermatozoa was analyzed using a  
176 dye labeled-PLA<sub>1</sub> specific substrate [35]. Sperm samples were divided into six groups; non-  
177 capacitated with or without H89 or A23187 and capacitated with or without H89 or A23187. The  
178 compound H89 was supplemented 10 min prior to the addition of pentoxifylline and dbcAMP.  
179 After capacitation for 1h, ionophore A23187 was added to cells (20 μM final concentration) after  
180 30 min of incubation and then samples were allowed to incubate for another 30 min. Spermatozoa  
181 were washed (300 x g, 3 min) twice using BWW media with BSA and then once with BWW media  
182 without BSA. Sperm pellets were then resuspended in BWW media without BSA to a final  
183 concentration of 20 x 10<sup>6</sup> sperm/ mL.

184 A stock solution of PED-A<sub>1</sub> substrate (5 mM in DMSO) was diluted (1:625) with BWW medium  
185 without BSA yielding a final concentration of 8 μM. Aliquots of 25 μL of the PED-A<sub>1</sub> working  
186 solution were placed in a v-bottom 96-well plate and then 25 μL of the sperm samples was added.  
187 Controls included wells containing only PED-A<sub>1</sub> solution or sperm cells. The plate was incubated  
188 at 37°C and fluorescence measurements were taken every 30 sec during a 1h-period using the  
189 microplate reader FLUOstar OPTIMA (BMG Labtech, Mornington, VIC, Australia) with  
190 excitation and emission wavelengths of 485 and 510 nm, respectively. Linear regression was  
191 calculated using the average results for the first 10 min of reading and reaction rates (slope) were  
192 calculated for each sample. PLA<sub>1</sub> activity was assessed in five independent experiments.

193

194

195

196 Aconitase Vectors

197 ACO2 cDNA was ligated into the pcDNA3-EGFP plasmid. Primers were designed to have HindIII  
198 (forward) and NotI (reverse) restriction sites as well as 8 extra base pairs on the ends to allow  
199 enzyme cleavage. Two different reverse primers were used to create two different plasmids, the  
200 first containing a linker sequence to create an ACO2-EGFP fusion, and the second containing a  
201 linker sequence followed by a (HIS)<sub>6</sub>-tag and stop codon to create his-tagged ACO2. This was  
202 achieved using mouse cDNA and the following overhanging primers:

203 Forward: ACGAATTC–AAGCTT–ATGGCGCCTTACAGCCTCCTGGT

204 Reverse 1: GGTGCTTA–GCGGCCGC–GAGCTTCCACCACCTCC–  
205 CTGCTGCAGCTCCTTCATCCTGTTG

206 Reverse 2: GGTGCTTA–GCGGCCGC–TCA–  
207 ATGGTGGTGGTGATGATGGCTTCCACCACCTCC–  
208 CTGCTGCAGCTCCTTCATCCTGTTG

209 For PCR, Thermo Scientific Phusion High-Fidelity DNA Polymerase was used and their  
210 instructions followed. Each 20 µl PCR was made up with the following concentrations: 1 x HF  
211 buffer, 200 µM dNTPs, 0.5 µM each of forward and reverse primer, ~100 ng DNA, 3% DMSO  
212 and 1 unit Phusion polymerase. PCR conditions were: 98°C for 30 sec, [98°C for 10 sec, 65°C for  
213 30 sec, 72°C for 2 min] x 35 cycles, 72°C for 10 min. Annealing temperature was optimized at  
214 65°C for both sets of primers.

215 PCR inserts and pcDNA3-EGFP vector were digested with Promega enzymes; NotI and HindIII  
216 after Wizard mini-prep kit clean-up. Insert and vector were ligated at a 3:1 ratio using Promega T4  
217 DNA ligase and then transformed into E. coli cells on ampicillin agar plates. Singles colonies were

218 cultured the following day and then plasmids extracted. Plasmids were again digested with HindIII  
219 and NotI to check for insertions and the ones containing inserts were sent away for Sanger  
220 sequencing using four sequencing primers to cover entire insert and check for mutations:  
221 GGACTTTCCAAAATGTCG, AGGCCGAACAGACATTGC, AGATGCAGACGAGCTTCC,  
222 TTCATCCAGTGGACAAGC.

223

#### 224 *Site directed mutagenesis*

225 To mimic the negative charge of the Sia modification on ACO<sub>2</sub>, we changed the amino acid 612  
226 (Asn or N) to aspartic acid (D) using site directed mutagenesis. A single base pair change on  
227 chr15:81913178 to change the codon from AAC to GAC was achieved using the following  
228 primers:

229 Forward: TGCTCATCGGTGCCATCAACATC

230 Reverse: GGTTGTTAGAGATGTCATCCAGATGCCCCAC

231 Phusion DNA Polymerase PCR was done using the same reaction as written in the above methods  
232 and the PCR conditions as follows: 98°C for 3 min, [98°C for 10 sec, 64 °C for 30 sec, 72°C for 6  
233 min] x 35 cycles, 72°C for 10 min. Following PCR, the plasmid bands were cut out of an agarose  
234 gel, purified and digested with DpnI from NEB. Following another clean-up step, the plasmids  
235 were transformed into E. coli and grown on agar plates overnight. Single colonies were selected  
236 the following day and cultures grown overnight. Plasmids were extracted from these colonies and  
237 sent away for sequencing to check for mutation using sequencing primer  
238 AGATGCAGACGAGCTTCC.

239 *Transfection*

240 HEK293T cells were used for transfection with ACO2-EGFP plasmid and ACO2-(HIS)<sub>6</sub> plasmid  
241 including the WT and N612D versions of these plasmids. We confirmed that human cells would  
242 be suitable for transfection with the mouse ACO2 gene due to almost identical sequences. Cells  
243 were split into 6-well plates to attain ~50% confluence the following day. Transfection was done  
244 with 5 µg plasmid DNA and 10 µg PEI in 3 mL media. Firstly, 5 µg of plasmid and 10 µg PEI  
245 were put into separate tubes and 150 µL DMEM (no FBS) added to each one. These were then  
246 mixed together and incubated for 30 min. Next, media in the 6-well plates was replaced with 2.7  
247 mL of fresh DMEM and the 300 µL DNA:PEI mix added. Cells were left to transfect for the times  
248 indicated and then harvested. ACO2-GFP cells were fixed using 4% paraformaldehyde for  
249 microscopy and FACS analysis or frozen at -80°C for immunoblotting. ACO2-(HIS)<sub>6</sub> cells were  
250 frozen at -80°C for immunoblotting or Aconitase assay.

251

252 *Aconitase Assay*

253 Aconitase assay from BioVision was used with adjusted methods.

254 Day 1: Frozen transfected HEK293T cells consisting of (HIS)<sub>6</sub>-wild-type ACO2 transfected (WT)  
255 and N612D mutant and control non-transfected cells were thawed on ice. Cells were resuspended  
256 in 400 mL lysis buffer (PBS pH 8, 10 mM imidazole, 0.5% tween) and then sonicated and  
257 centrifuged (16,000 g, 4°C) for 15 min. A 200 µL aliquot of N612D and control samples were  
258 placed in fresh tubes and the rest discarded. The WT samples were split into 3 tubes: 200 µL, 100  
259 µL and 50 µL. A 200 µL of lysis buffer and then 50 µL Ni-NTA agarose beads were added and  
260 samples rolled for 1 h at 4°C. Beads were washed thrice in wash buffer (PBS pH 8, 20 mM

261 imidazole, 0.5% tween) and once in kit assay buffer. Afterwards, beads were resuspended in 100  
262  $\mu$ L kit assay buffer, 10  $\mu$ L activation solution was added, and samples were rolled for 1 h at 4°C.  
263 One hundred  $\mu$ L of reaction mix was added to each tube and samples rolled at room temperature  
264 overnight.

265 Day 2: Frozen non- and capacitated sperm cells were thawed on ice. Cells were resuspended in  
266 100  $\mu$ L kit assay buffer, sonicated and centrifuged (16,000 g; 4°C) for 15 min. Ten  $\mu$ L of activation  
267 solution was added and samples incubated for 1 h on ice. Afterwards, 100  $\mu$ L reaction mix was  
268 added to each tube and samples incubated at room temperature for 2.5 h. Standards were made  
269 according to instructions and allowed to incubate for 30 min. The beads from day-1 preparation  
270 were centrifuged and, together with the non- and capacitated sperm prepared on day 2, were loaded  
271 in a 96-well plate in 100  $\mu$ L duplicates. Ten  $\mu$ L of developer was added, samples incubated at  
272 room temperature 25°C and read at 450 nm.

273 Following kit, nickel bead enrichment, (HIS)<sub>6</sub>-recombinant protein were eluted with 250 mM  
274 imidazole and then frozen along with non- and capacitated samples. For immunoblotting, samples  
275 were methanol/chloroform precipitated and lysed in SDS-PAGE buffer.

276

### 277 *SDS-PAGE and immunoblotting*

278 Non-capacitated and capacitated mouse spermatozoa (with and without H89) were prepared as  
279 described above and then diluted in SDS-PAGE buffer. Protein (10  $\mu$ g) was separated by SDS-  
280 PAGE using 4-20% precast polyacrylamide gels (NuSep Ltd, Lane Cove, NSW, Australia) and  
281 then transferred onto nitrocellulose membrane Watman® Optitran® BA-S 85 (GE Healthcare,  
282 Castle Hill, NSW, Australia). The membrane was blocked (1 h at room temperature) and incubated

283 overnight at 4°C with rabbit polyclonal antibody raised against EL (orb100394, LIPG; Biorbyt) at  
284 a dilution of 1:500 in 5% (w/v) skim milk TBS-T (0.02 M Tris, 0.15 M NaCl, 0.1% (v/v) Tween-  
285 20; pH 7.6).

286 After three washes, membrane was incubated for 1 h at room temperature with anti-rabbit IgG  
287 horseradish peroxidase (HRP) conjugate (Sigma-Aldrich) at a concentration of 1:1000 in 5% (w/v)  
288 skim milk TBS-T. The membrane was washed thrice, and immuno-reacted proteins were detected  
289 using an enhanced chemiluminescence (ECL) kit (Amersham International) according to the  
290 manufacturer's instructions. Equal loading was confirmed by stripping the membrane and then re-  
291 probing it with a mouse monoclonal anti- $\alpha$ -tubulin antibody.

292 To confirm the capacitation of sperm cells and the efficiency of H89 at inhibiting tyrosine  
293 phosphorylation via PKA, samples were probed with the mouse monoclonal anti-  
294 phosphotyrosine-peroxidase antibody PT66 (A5964; Sigma-Aldrich). Loading control was  
295 performed using mouse monoclonal anti- $\alpha$ -tubulin antibody.

296 Immunoblots of WT and mutant ACO2 were essentially performed as previously described [34].  
297 The following antibody dilutions were used: rabbit polyclonal anti-Aconitase 2 antibody at 1:1000  
298 (ab83528; Abcam), rabbit polyclonal anti-6X His tag antibody at 1:1000 (ab1187; Abcam). All  
299 secondary antibodies were used at a 1:1000 dilution. Anti-GFP was a kind gift from Peter Lewis  
300 and used at 1:1000.

301

### 302 *Immunocytochemistry*

303 Capacitated and non-capacitated intact mouse spermatozoa were fixed in 4% (w/v) formaldehyde  
304 for 10 min at room temperature. Cells were washed three times in PBS containing 0.5 M glycine,

305 immobilized on poly-L-lysine coverslips and permeabilized with ice cold methanol for 10 min.  
306 Coverslips were washed, blocked for 1 h with 3% (w/v) BSA in PBS and incubated overnight with  
307 anti-EL antibody in a 1:50 dilution with PBS containing 1% (w/v) BSA. Following three washes  
308 with PBS, cells were incubated with Alexa Fluor® 488 goat anti-rabbit IgG (Life technologies) in  
309 a 1:100 dilution with PBS containing 1% (w/v) BSA. Coverslips were washed as described above  
310 and then mounted with Mowiol antifade medium. Cells were evaluated using phase contrast and  
311 epifluorescence microscopy.

312

### 313 *Acrosomal status*

314 The acrosomal status of mouse spermatozoa was assessed either at time 0 (non-capacitated) or  
315 following 30 min of capacitation (37°C; 5% CO<sub>2</sub>). After 30 min of incubation, the ionophore  
316 A23187 (10 µM final concentration in DMSO) or DMSO vehicle only were added and then cells  
317 were incubated for 30 min. Samples were washed twice using PBS and 10 µl of sperm suspension  
318 was spotted onto superfrost slides, spread with a glass pipette and air-dried. Slides were immersed  
319 in absolute methanol for 15 min, rinsed with PBS and then incubated for 30 min with fluorescein  
320 isothiocyanate-conjugated *Arachis hypogaea* peanut agglutinin (FITC-PNA) (15 µg/mL final  
321 concentration). The slides were rinsed in PBS and mounted with antifade media. For each slide,  
322 images of adjacent fields were recorded under a x40 magnification to achieve a sperm count of at  
323 least 100 spermatozoa. Spermatozoa were classified into one of the three categories of FITC-PNA  
324 labelling: I = intact acrosome; II = partial acrosome reaction; and III = complete acrosome reaction.  
325 For each experimental condition, a minimum of 3 slides were examined and quantified.

326

327 *Statistical analysis*

328 The data obtained by MS-based label-free quantification were normalized among runs using the  
329 average area of five different glycopeptides visually selected based on their quality and constant  
330 intensity. The normalized area of each glycopeptide was then compared between non-capacitated  
331 and capacitated sperm samples using student's *t*-test. Relative immunoreactivity for EL and  $\alpha$ -  
332 tubulin and sperm PLA<sub>1</sub> activity were compared among groups using paired *t*-test. P-values < 0.01  
333 were considered as significant. Standard errors are shown in the graphs. The data for acrosome  
334 reaction from 5 biological replicates were subjected to analysis of variance (two-way ANOVA)  
335 followed by paired *t*-test. Data are shown as mean  $\pm$  S.D. when not specified otherwise.

336

337 *Molecular modelling; Covalent docking model of Sialic acid binding of Asn612 to aconitate*  
338 *hydratase*

339 Molecular docking experiments were carried out using the program GOLD (Genetic Optimization  
340 for Ligand Docking) version 5.2 and favouring the CHEMPLP Scoring system (Verdonk 2003).  
341 The three-dimensional iteration of Sialic acid (MolPort-008-267-866) was used for covalent  
342 docking onto the identified target residue of Asn612 on a model of Aconitate hydratase,  
343 mitochondrial precursor from *Mus musculus* (EC: 4.2.1.3) generated by the PHYRE2 protein  
344 recognition server Kelley (2015). The proposed reaction mechanism and subsequent product is  
345 depicted in Scheme 1. The size of the search domain was set to 10 Å and the covalent docking  
346 function within GOLD was employed. Docking was executed using a 100% search efficiency,  
347 generating ten Genetic Algorithm (GA) runs, while the rotameric states of several sidechains  
348 including Gln563, Lys605 and Arg648 were set to library rotamer orientations and the remainder



349 of the site remained rigid. The generated binding poses were then inspected, and conformations  
350 were chosen for further analysis taking into account their ranking and interactions with the probed  
351 residues. Molecular visualizations were performed using the software package PYMOL  
352 (Schrödinger, NY, USA).

353

## 354 **Results**

355 In order to determine the efficiency of the protocol used here to induce sperm capacitation, tyrosine  
356 phosphorylation was measured (Fig. 1). As shown, tyrosine phosphorylation increased during  
357 capacitation, which could be abrogate with the PKA inhibitor H89, suggesting that the sperm cells  
358 used in this study were capacitating. The experimental paradigm used in this study was to compare  
359 the changes associated with the capacitation process itself (Cap vs Cap-H, Fig. 2) as opposed to  
360 changes over time (N-Cap vs Cap, Fig. 2).

361

### 362 *Sialylated glycoproteins identified in mouse sperm*

363 The protocol to enrich for sialylated N-linked glycopeptides is shown in Figure 2. Herein,  
364 spermatozoa were obtained from the mouse epididymides, combined, and then separated into two  
365 separate tubes. Whilst one tube had capacitating media, the other lacked sodium bicarbonate which  
366 is essential for this process. The samples were washed, lysed and digested. Sialylated-glycoprotein  
367 enrichment was performed using TiO<sub>2</sub> beads. Although this is not specific for glycopeptides, but  
368 rather for negatively charged molecules, the elution through PNGase F treatment of the beads  
369 allows the selection of N-linked glycopeptides generally or sialylated glycopeptides specifically.

370 Enrichment of sialylated N-linked glycopeptides using TiO<sub>2</sub> allowed the identification of 142  
371 unique peptides, which were from 90 different glycoproteins (Table 1), demonstrating that some  
372 proteins possessed N-linked glycopeptides with terminal Sia in more than one position. Of  
373 particular interest, the characterization of the glycopeptides containing Sia residues represented  
374 36.7% of the total non-reductant peptides identified by MS/MS. This is in perfect agreement with  
375 our previous paper with rat sperm, in which around 34% of the peptides identified were classified  
376 as glycopeptides after enrichment using TiO<sub>2</sub> [33].

377 Due to ion fragmentation patterns (i.e., no visualization of the *y*- or *b*- fragment ion for the  
378 deamidated Asn), a precise identification of the residue containing the deamidation was not  
379 possible in all cases. Hence, the peptides exhibiting ambiguous annotation of the deamidated  
380 residue are indicated in Table 1 with an asterisk. Supplementary I contains MS/MS spectrum from  
381 all peptides present in Table 1 whereas Supplementary II presents data such as measured *m/z*  
382 values, peptide charge and retention times.

383

#### 384 *Changes in sialylated N-linked glycopeptides during capacitation*

385 The data for label-free quantification of the N-linked glycopeptides in non-capacitated versus  
386 capacitated sperm are shown in Table 1. Some glycopeptides were presented at very low amount,  
387 impairing their quantification in some biological replicates. These cases are indicated in Table 1  
388 as not determined (ND) since we were not confident to report these further. Of interest, nine (6.3%)  
389 of the glycopeptides identified here underwent significant changes during sperm capacitation.  
390 These glycopeptides belong to the proteins: ACO2, C4b-binding protein (C4BP), EL, inactive  
391 serine protease 39 (PRSS39, also known as testicular-specific serine protease 1; TESP1), serine

392 protease 52 (PRSS52, also known as testicular-specific serine protease 3; TESP3), testis-expressed  
393 protein 101 (TEX101) and zonadhesin (Table 1). Interesting, these glycopeptides were shown to  
394 be reduced during capacitation except for the peptide from ACO2, a protein involved in the  
395 tricarboxylic acid (TCA) cycle (Table 1).

396

### 397 *Determination of EL amount and sub-cellular localization*

398 In order to determine the consequences of sialylation changes during capacitation, we choose two  
399 proteins for further study: the EL and ACO2. The EL has been reported as primarily having PLA<sub>1</sub>  
400 activity [36]. This was of particular interest, since changes in the composition of lipids from cell  
401 membranes, such as the formation of lysophospholipids by phospholipids hydrolysis, are known  
402 to modify membrane fluidity [37, 38] and function through the modulation of receptors [39],  
403 channels [40, 41] and enzyme activity [42] within its structure. Considering that morphological  
404 and functional changes in sperm membranes, including alteration in membrane fluidity, are  
405 essential for capacitation [43] and that lysophospholipids may be involved in the modulation of  
406 the acrosome reaction [44], we further investigated the behavior of EL during this process.

407 Immunoblotting for EL was performed, aiming to determine what happens to the entire protein  
408 during capacitation. As shown in Figure 3, the total amount and the molecular weight of EL did  
409 not change after capacitation (Fig. 3A, lanes 1 and 2). In addition, the use of the PKA inhibitor  
410 H89 during capacitation also did not affect the amount of EL (Fig. 3A, lanes 2 and 3). To  
411 demonstrate equal loading, we re-probed the sample with anti- $\alpha$  tubulin antibody (Fig. 3B). Using  
412 the software Image J, the quantitative values of each band were plotted to confirm that no  
413 significant change occur in EL expression after capacitation (Fig. 3C).

414 To verify whether the protein EL is redistributed in spermatozoa during capacitation, we  
415 performed immunostaining using anti-EL antibody. Immunostaining for EL was observed in both  
416 head and tail regions of non-capacitated (Fig. 4a,c) and capacitated (Fig. 4b,d) mouse sperm. For  
417 both groups, the anterior acrosome region stained for EL whereas the equatorial region showed no  
418 staining. In addition, the staining intensity of the postacrosomal sheath showed high variation  
419 among cells; being absent in some cases (Fig. 4b, white arrow exemplifies this variation). In the  
420 tail region, although the midpiece and the cytoplasmic droplet showed high staining for EL, we  
421 noted that some cells exhibited weaker labeling of the midpiece (Fig. 4c,d). Of interest, the  
422 percentage of these cells, with reduced immunoreactivity for EL at the midpiece, increased when  
423 sperm was incubated in capacitating conditions (from around 7% to 68%). The same was observed  
424 in samples capacitated with the PKA inhibitor H89, suggesting that the diminish in EL  
425 immunofluorescence within the midpiece is independent of PKA (data not shown). Secondary only  
426 controls showed no fluorescence (Fig. 4e,f).

427

#### 428 *Loss in EL activity occurs during capacitation, independent of H89 and the acrosome reactions*

429 In order to determine if the loss of Sia residue on EL affected enzyme activity, we specifically  
430 measured PLA<sub>1</sub> activity on both non- and capacitated spermatozoa. Furthermore, as the  
431 immunofluorescence showed quite a varied pattern of EL expression, including acrosome location,  
432 we wanted to see if the loss of the acrosome had any effect of the overall EL activity. Therefore,  
433 we incubated sperm under non- or capacitating condition, with and without H89. Secondly, both  
434 non- and capacitated spermatozoa were induced to undergo the acrosome reaction. These sperm  
435 cells were subsequently washed, then the level of intact, partial or complete acrosome loss were

436 measured using FITC-PNA staining. As shown in Figure 5, capacitated sperm plus ionophore  
437 A23187 had the highest level of complete acrosomal loss as expected.

438 To determine whether a change in EL activity occurred during capacitation, we measured PLA<sub>1</sub>  
439 activity before and after capacitation, together with the inhibitor H89 or the acrosomal-inducer,  
440 ionophore A23187. We observed a significant loss in the PLA<sub>1</sub> activity of EL during capacitation  
441 (Fig. 6A, bars N-cap vs Cap). An example of the loss in PLA<sub>1</sub> activity is demonstrated in Figure  
442 6B. Here, two of the five biological replicates are shown over time from either non-capacitated  
443 (solid line) or capacitated (dotted line) sperm populations. Addition of the PKA inhibitor H89,  
444 which is commonly used to prevent capacitation, failed to abrogate the loss of PLA<sub>1</sub> activity (Fig.  
445 6A, N-cap + H89 vs Cap + H89). Furthermore, the loss of the acrosome had no further bearing on  
446 the reduction of the PLA<sub>1</sub> activity in EL, with acrosome-reacted capacitated spermatozoa (Fig. 6A,  
447 bar Cap + A23187) having a similar activity to the capacitated (Fig. 6A, bar Cap) and the H89  
448 “capacitated” (Fig. 6A, Cap + H89) cells. In all cases, the amount of activity was normalized to  
449 the amount of endothelial lipase present with an immunoblot.

450

#### 451 *Sialylation of N612 inhibits ACO2 activity*

452 Spermatozoa are catabolic in nature and, as such, it is not a surprise that the majority of Sia residues  
453 are lost during capacitation. However, in this study, we observed one enzyme that had an increase  
454 in sialylation, namely ACO2. To further understand this finding, we measured total Aconitase  
455 activity before and following mouse capacitation. As shown, during capacitation a statistically  
456 significant decrease in the level of Aconitase activity was observed (Fig. 7). Although this  
457 measurement would include both cytoplasmic and mitochondrial Aconitase activity, we reasoned

458 that sperm have very little cytoplasm, therefore, the bulk of Aconitase activity should be from the  
459 mitochondrial form.

460 To confirm that a decrease in ACO2 activity occurs specifically through sialylation at N612, we  
461 made both WT and Sia mimic, whereby the N612 was replaced by the negatively charged Aspartic  
462 acid (N612D). In both cases (WT and mimic), we made a GFP- and a HIS-tagged separate proteins.

463 Expression of the GFP-tagged proteins showed both WT and mutant were expressed in the  
464 mitochondria as expected (Fig. 8A-D). Of interest, under fluorescence microscopy, we also noted  
465 a decrease in the level of GFP-tagged mutant, yet the number of cells transfected was equal  
466 (compare Fig. 8A and 8B). To support this, we ran the cells through flow-cytometry. Analysis  
467 demonstrated that, in every replicate, the same number of cells were transfected (on average 35%),  
468 however, the mean level of GFP-fluorescence was significantly lower in the N612E-Aconitase  
469 expressing cells. For example, the histogram on Figures 8C and 8D demonstrates that the peak  
470 height for GFP fluorescence in WT is slightly higher (Fig. 8E, black downward arrow) than in the  
471 N612E mutant (Fig. 8F, black downward arrow). This suggests that cells are less favorable to the  
472 expression of the N612E mutant over the WT. To confirm this hypothesis, we ran a SDS gel,  
473 transferred and probed it with antibodies against GFP- (not shown) or (His)<sub>6</sub>-tagged proteins (Fig.  
474 9A,B). As shown, WT ACO2 is more abundant than the mutant form (Fig. 9A,B; compare lanes 1  
475 to 4). From our estimation, the N612E expression is between 25-50% of that of WT (see lanes 3  
476 and 4 *vs* 5).

477 We next measured the ACO2 activity of the WT and N612E mutant (Fig. 10). The use of equal  
478 amounts of recombinant protein was confirmed by immunoblotting. Remarkably, even when left  
479 overnight, we were unsuccessful in obtaining any ACO2 activity from the N612E mutant. In

480 contrast, we could easily detect WT ACO2 activity. When put together, these datasets suggest that  
481 a switch in the ACO2 activity occurs during capacitation. This change in activity pattern is likely  
482 related to the modifications in the metabolic pathways described during the capacitation of mouse  
483 spermatozoa (i.e., from the oxidative phosphorylation pathway to the glycolytic pathway).

#### 484 *Modelling the bound sialoglycoprotein to Aconitate hydratase*

485 To understand the impact sialation would have on N612, we modelled the effect. Published crystal  
486 structures of Aconitate hydratase [45-48] and our highly homologous model, describes a large  
487 macromolecular structure comprising of four distinct domains employing a [4Fe-4S] cluster to  
488 catalyse the stereospecific dehydration of citrate to isocitrate [49]. Within the enzyme itself, sits  
489 several highly conserved amino acids, such as Asp192, His194 and Arg607 that are crucial for  
490 ACO2 activity (shown in Fig. 11). N612 resides on a short  $\alpha$ -helical element immediately atop the  
491 active site, in an area often denoted as domain 4 [50]. In order to fit a sialic acid residue with N612,  
492 multiple changes in rotamers of sidechains were required. This allowed the formation of new salt  
493 bridges and hydrogen bonds between the sugar and the  $\alpha$ -helical structure including the residue  
494 N614 (Asn615) and Gln563 which is present on an adjacent loop (Fig 11A,B). This data suggest  
495 that inhibition of Aconitase activity, through siltation of Asparagine 612, is due to major distortion  
496 of the active site which prevents catalysis from occurring.

497

#### 498 **Discussion**

499 Despite the importance of capacitation, the molecular mechanisms underlying this process are not  
500 yet fully understood. Previous studies have suggested that one facet of capacitation is a loss in Sia  
501 residues, which may be modulated by one (humans) or two (mouse) neuraminidases, namely

502 neuraminidase 1 and 3 [27]. In the present study, using a LC-MS/MS-based approach, we were  
503 able to investigate capacitation-related changes of N-linked glycoproteins bearing terminal Sia.  
504 Surprisingly, we found very little regulation of Sia within proteins groups following *in vitro*  
505 capacitation, with only 6.3% (9 of 142 peptides) demonstrating a significant change.

506 According to our data, the enzyme EL is one of the sperm proteins in which the Sia content is  
507 altered during capacitation. Previous studies have shown that four (N62, N118, N375, and N473)  
508 of the five potential N-glycosylation sites of human EL are occupied by glycan moieties [51, 52].  
509 In the present study, the sugar moiety at the N62 glycosylation site of EL was found to contain Sia  
510 in its structure. In addition, the peptide containing this glycosylation site was significantly reduced  
511 after *in vitro* capacitation, despite the fact that both quantity and molecular weight of EL remained  
512 unchanged. This suggests that a loss of a small glycan moiety or of a Sia residue itself occurs  
513 within EL during capacitation. Notably, a sialylated N-glycan structure at the corresponding  
514 glycosylation site (N64) has also been identified by our group in the EL of rat sperm [33]. In this  
515 case, spermatozoa were taken from the caput, corpus and cauda regions of the epididymis.  
516 Remarkably, the Sia residue within EL was only found in spermatozoa derived from the caudal  
517 location. Furthermore, we have observed that the amount of EL within rat spermatozoa does not  
518 change, suggesting that Sia is added to EL during epididymal transit (**data not published**; [33]).  
519 Given that Sia residues are removed from the same glycosylation site during capacitation, it is  
520 likely that this glycan moiety plays a specific role in regulating EL enzyme activity.

521 The glycosylation site at N62 of mouse EL is a conserved feature among animals and other  
522 members of the triglyceride lipase gene family, such as lipoprotein lipase and hepatic lipase. Using  
523 recombinant proteins, two separate studies have produced point mutations of the amino acids that  
524 are glycosylated in EL. Interestingly, in both cases, the loss of N62 led to increased EL activity



525 [51, 52]. Due to their negative charge and hydrophilicity, Sia residues within this glycan moiety  
526 could influence the structure and/or substrate specificity of EL, therefore, regulating its enzymatic  
527 activity. Of note however, we observed a decrease in the PLA<sub>1</sub> activity of EL following reduction  
528 of its sialylated glycopeptides (N62 glycosylation site) during capacitation. We can only assume  
529 that, besides the loss of N62, EL is likely to be regulated in other (as yet unknown) ways in order  
530 to switch off its activity.

531 In addition to EL, we found N612 sialylation of ACO2 increase following *in vitro* capacitation. This  
532 enzyme catalyzes the non-redox reaction of the TCA cycle in which stereo-specific isomerization  
533 of citrate to isocitrate occurs [53]. Adequate supply of ATP is essential to support capacitation-  
534 associated changes such as hyperactivation [54]. In mouse, it is fairly well understood that, during  
535 capacitation, there is a switch from oxidative phosphorylation over to glycolysis [5]. Thus, non-  
536 capacitated sperm show high oxygen consumption, which diminishes as sperm make the switch  
537 over to glycolysis during capacitation [5]. Herein, such a switch could be brought about through  
538 sialylation of ACO2 particularly N612. Indeed, modelling of the enzyme suggests that the Asn  
539 group sits atop of the ACO2 activity site (Fig. 11) in a highly conserved region. Analyses of  
540 multiple X-ray crystal structures of Aconitate hydratase has shown that a vast array of residues  
541 from all four domains of the enzyme are required to carry out catalysis [55] whether it's to bind  
542 and recognize substrate or ligate the [4Fe-4S] cluster. Similarly, this complex array, dependent on  
543 bound ligands, displays a number of nuanced and obvious conformational changes within its active  
544 site and other domains [55]. Thus, it is apparent that in our model, inhibition likely occurs through  
545 segmental conformational change of the antiparallel helical motif that N612 is a part (residues 606-  
546 612 in our model; Fig. 11). As this includes active site residue Arg607, it is possible changes in  
547 substrate binding may occur to prevent catalysis such as a rotameric shifts or larger domain

548 movements that may prevent substrate binding and release, a trait often linked with N-linked  
549 glycosylation [56]. With the observation that both the mutation to Glutamate (Glu612) and the  
550 Asn612 sialic acid (N-link) modified enzymes shuts down activity of the enzyme and the former  
551 modification in our models (not depicted) suggests a new salt bridge or hydrogen bond with the  
552 either the sidechain amine of Gln563 or Lys605 is likely. This further underlines the potential  
553 sensitivity of ACO2 activity with respect to changes to this motif with the potential they instigate  
554 larger downstream changes in other domains.

555         Inspection of Uniprot suggests that the glycosylation at N612 has never been reported in  
556 any other cell type and, as such, may represent a novel mechanism, attributed just to sperm cells.  
557 Unfortunately, compounds to block or inhibit sialic acid transferases are not cell permeable and,  
558 for this reason, we were unable to directly ascribe the significance of a lack of ACO2 activity to  
559 sperm physiology. Additionally, an indiscriminate blockage of sialyltransferases would have  
560 raised doubts about what other proteins/pathways could also have been co-inhibited and this  
561 obfuscated the interpretation. Our leading hypothesis is that glycolysis is required for the rapid  
562 movement of the sperm flagella, in a process known as hyperactivation. The latter being essential  
563 for fertilization to occur. Therefore, sperm cells being transcriptionally and translationally silent  
564 cells may change ACO2 activity via sialylation of this protein, which facilitates the shuttling of its  
565 metabolic process from oxidative phosphorylation over to glycolysis.

566

## 567 **References**

568

569

- 570 1. Chang MC: **Fertilizing capacity of spermatozoa deposited into the fallopian tubes.** *Nature* 1951,  
571 **168**(4277):697-698.
- 572 2. Visconti PE, Bailey JL, Moore GD, Pan D, Olds-Clarke P, Kopf GS: **Capacitation of mouse**  
573 **spermatozoa. I. Correlation between the capacitation state and protein tyrosine**  
574 **phosphorylation.** *Development* 1995, **121**(4):1129-1137.
- 575 3. Visconti PE, Moore GD, Bailey JL, Leclerc P, Connors SA, Pan D, Olds-Clarke P, Kopf GS:  
576 **Capacitation of mouse spermatozoa. II. Protein tyrosine phosphorylation and capacitation are**  
577 **regulated by a cAMP-dependent pathway.** *Development* 1995, **121**(4):1139-1150.
- 578 4. Baker MA: **Proteomics of post-translational modifications of mammalian spermatozoa.** *Cell*  
579 *and tissue research* 2016, **363**(1):279-287.
- 580 5. Fraser LR, Lane M: **Capacitation-and fertilization-related alterations in mouse sperm oxygen**  
581 **consumption.** *Reproduction* 1987, **81**(2):385-393.
- 582 6. Miki K, Qu W, Goulding EH, Willis WD, Bunch DO, Strader LF, Perreault SD, Eddy EM, O'Brien DA:  
583 **Glyceraldehyde 3-phosphate dehydrogenase-S, a sperm-specific glycolytic enzyme, is required**  
584 **for sperm motility and male fertility.** *Proceedings of the National Academy of Sciences* 2004,  
585 **101**(47):16501-16506.
- 586 7. Baker MA: **The'omics revolution and our understanding of sperm cell biology.** *Asian journal of*  
587 *andrology* 2011, **13**(1):6.
- 588 8. Baker MA, Nixon B, Naumovski N, Aitken RJ: **Proteomic insights into the maturation and**  
589 **capacitation of mammalian spermatozoa.** *Systems biology in reproductive medicine* 2012,  
590 **58**(4):211-217.
- 591 9. Ficarro S, Chertihin O, Westbrook VA, White F, Jayes F, Kalab P, Marto JA, Shabanowitz J, Herr  
592 JC, Hunt DF: **Phosphoproteome analysis of capacitated human sperm evidence of tyrosine**  
593 **phosphorylation of a kinase-anchoring protein 3 and valosin-containing protein/p97 during**  
594 **capacitation.** *Journal of Biological Chemistry* 2003, **278**(13):11579-11589.
- 595 10. Porambo JR, Salicioni AM, Visconti PE, Platt MD: **Sperm phosphoproteomics: historical**  
596 **perspectives and current methodologies.** *Expert review of proteomics* 2012, **9**(5):533-548.
- 597 11. Brewis IA, Gadella BM: **Sperm surface proteomics: from protein lists to biological function.**  
598 *MHR: Basic science of reproductive medicine* 2009, **16**(2):68-79.
- 599 12. Varki A: **Biological roles of oligosaccharides: all of the theories are correct.** *Glycobiology* 1993,  
600 **3**(2):97-130.
- 601 13. Lowe JB, Marth JD: **A genetic approach to mammalian glycan function.** *Annual review of*  
602 *biochemistry* 2003, **72**(1):643-691.
- 603 14. Fei W, Hao X: **Wheat germ agglutinin (WGA) receptors on human sperm membrane and male**  
604 **infertility.** *Archives of andrology* 1990, **24**(1):97-97.
- 605 15. Jiménez I, Gonzalez-Marquez H, Ortiz R, Betancourt M, Herrera J, Fierro R: **Expression of lectin**  
606 **receptors on the membrane surface of sperm of fertile and subfertile boars by flow cytometry.**  
607 *Archives of andrology* 2002, **48**(2):159-166.
- 608 16. Steele M, Wishart G: **Demonstration that the removal of sialic acid from the surface of chicken**  
609 **spermatozoa impedes their transvaginal migration.** *Theriogenology* 1996, **46**(6):1037-1044.
- 610 17. Yudin AI, Generao SE, Tollner TL, Treece CA, Overstreet JW, Cherr GN: **Beta-defensin 126 on the**  
611 **cell surface protects sperm from immunorecognition and binding of anti-sperm antibodies.**  
612 *Biology of reproduction* 2005, **73**(6):1243-1252.
- 613 18. Ma X, Pan Q, Feng Y, Choudhury BP, Ma Q, Gagneux P, Ma F: **Sialylation facilitates the**  
614 **maturation of mammalian sperm and affects its survival in female uterus.** *Biology of*  
615 *reproduction* 2016, **94**(6):123, 121-110.

- 616 19. Tollner TL, Yudin AI, Treece CA, Overstreet JW, Cherr GN: **Macaque sperm coating protein**  
617 **DEFB126 facilitates sperm penetration of cervical mucus.** *Human reproduction* 2008,  
618 **23(11):2523-2534.**
- 619 20. Focarelli R, Giuffrida A, Rosati F: **Changes in the sialylglycoconjugate distribution on the human**  
620 **sperm surface during in-vitro capacitation: partial purification of a 20 kDa sialylglycoprotein of**  
621 **capacitated spermatozoa.** *MHR: Basic science of reproductive medicine* 1995, **1(8):369-373.**
- 622 21. Mahmoud A, Parrish J: **Oviduct fluid and heparin induce similar surface changes in bovine**  
623 **sperm during capacitation: a flow cytometric study using lectins.** *Molecular Reproduction and*  
624 *Development: Incorporating Gamete Research* 1996, **43(4):554-560.**
- 625 22. Medeiros C, Parrish J: **Changes in lectin binding to bovine sperm during heparin-induced**  
626 **capacitation.** *Molecular Reproduction and Development: Incorporating Gamete Research* 1996,  
627 **44(4):525-532.**
- 628 23. Jiménez I, González-Márquez H, Ortiz Ro, Herrera JA, García A, Betancourt M, Fierro R: **Changes**  
629 **in the distribution of lectin receptors during capacitation and acrosome reaction in boar**  
630 **spermatozoa.** *Theriogenology* 2003, **59(5-6):1171-1180.**
- 631 24. Rosado A, Velázquez A, Lara-Ricalde R: **Cell polarography. II. Effect of neuraminidase and**  
632 **follicular fluid upon the surface characteristics of human spermatozoa.** *Fertility and sterility*  
633 1973, **24(5):349-354.**
- 634 25. Iqbal N, Hunter A: **Comparison of various bovine sperm capacitation systems for their ability to**  
635 **alter the net negative surface charge of spermatozoa.** *Journal of dairy science* 1995, **78(1):84-**  
636 **90.**
- 637 26. Focarelli R, Rosati F, Terrana B: **Sialylglycoconjugates release during in vitro capacitation of**  
638 **human spermatozoa.** *Journal of andrology* 1990, **11(2):97-104.**
- 639 27. Ma F, Wu D, Deng L, Secrest P, Zhao J, Varki N, Lindheim S, Gagneux P: **Sialidases on**  
640 **mammalian sperm mediate deciduous sialylation during capacitation.** *Journal of Biological*  
641 *Chemistry* 2012, **287(45):38073-38079.**
- 642 28. Davis BK, Byrne R, Bedigian K: **Studies on the mechanism of capacitation: albumin-mediated**  
643 **changes in plasma membrane lipids during in vitro incubation of rat sperm cells.** *Proceedings*  
644 *of the national academy of sciences* 1980, **77(3):1546-1550.**
- 645 29. Baker MA, Krutskikh A, Curry BJ, McLaughlin EA, Aitken RJ: **Identification of cytochrome P450-**  
646 **reductase as the enzyme responsible for NADPH-dependent lucigenin and tetrazolium salt**  
647 **reduction in rat epididymal sperm preparations.** *Biology of reproduction* 2004, **71(1):307-318.**
- 648 30. Baker MA, Krutskikh A, Curry BJ, Hetherington L, Aitken RJ: **Identification of cytochrome-b5**  
649 **reductase as the enzyme responsible for NADH-dependent lucigenin chemiluminescence in**  
650 **human spermatozoa.** *Biology of reproduction* 2005, **73(2):334-342.**
- 651 31. Daniel Jr J: **Methods in mammalian embryology.** *Methods in mammalian embryology* 1971.
- 652 32. Wessel D, Flugge UI: **A method for the quantitative recovery of protein in dilute solution in the**  
653 **presence of detergents and lipids.** *Anal Biochem* 1984, **138(1):141-143.**
- 654 33. Villaverde AISB, Hetherington L, Baker MA: **Quantitative glycopeptide changes in rat sperm**  
655 **during epididymal transit.** *Biology of reproduction* 2016, **94(4):91, 91-13.**
- 656 34. Baker MA, Naumovski N, Hetherington L, Weinberg A, Velkov T, Aitken RJ: **Head and flagella**  
657 **subcompartmental proteomic analysis of human spermatozoa.** *Proteomics* 2013, **13(1):61-74.**
- 658 35. Darrow AL, Olson MW, Xin H, Burke SL, Smith C, Schalk-Hihi C, Williams R, Bayoumy SS,  
659 Deckman IC, Todd MJ: **A novel fluorogenic substrate for the measurement of endothelial lipase**  
660 **activity.** *Journal of lipid research* 2011, **52(2):374-382.**
- 661 36. McCoy MG, Sun G-S, Marchadier D, Maugeais C, Glick JM, Rader DJ: **Characterization of the**  
662 **lipolytic activity of endothelial lipase.** *Journal of lipid research* 2002, **43(6):921-929.**

- 663 37. Seu KJ, Cambrea LR, Everly RM, Hovis JS: **Influence of lipid chemistry on membrane fluidity: tail**  
664 **and headgroup interactions.** *Biophysical journal* 2006, **91**(10):3727-3735.
- 665 38. Dawaliby R, Trubbia C, Delporte C, Noyon C, Ruyschaert J-M, Van Antwerpen P, Govaerts C:  
666 **Phosphatidylethanolamine is a key regulator of membrane fluidity in eukaryotic cells.** *Journal*  
667 *of Biological Chemistry* 2016, **291**(7):3658-3667.
- 668 39. McCallum CD, Epanand RM: **Insulin receptor autophosphorylation and signaling is altered by**  
669 **modulation of membrane physical properties.** *Biochemistry* 1995, **34**(6):1815-1824.
- 670 40. Inoue N, Hirata K, Yamada M, Hamamori Y, Matsuda Y, Akita H, Yokoyama M:  
671 **Lysophosphatidylcholine inhibits bradykinin-induced phosphoinositide hydrolysis and calcium**  
672 **transients in cultured bovine aortic endothelial cells.** *Circulation research* 1992, **71**(6):1410-  
673 1421.
- 674 41. Lundbaek JA, Andersen OS: **Lysophospholipids modulate channel function by altering the**  
675 **mechanical properties of lipid bilayers.** *The Journal of general physiology* 1994, **104**(4):645-673.
- 676 42. Owens K, Kennett FF, Weglicki WB: **Effects of fatty acid intermediates on Na<sup>+</sup>-K<sup>+</sup>-ATPase**  
677 **activity of cardiac sarcolemma.** *American Journal of Physiology-Heart and Circulatory Physiology*  
678 1982, **242**(3):H456-H461.
- 679 43. Salicioni AM, Platt MD, Wertheimer EV, Arcelay E, Allaire A, Sosnik J, Visconti PE: **Signalling**  
680 **pathways involved in sperm capacitation.** *Society of Reproduction and Fertility supplement*  
681 2007, **65**:245.
- 682 44. Roldan E, Shi Q: **Sperm phospholipases and acrosomal exocytosis.** *Front Biosci* 2007, **12**(1):89-  
683 104.
- 684 45. Lloyd S, Lauble H, Prasad G, Stout C: **The mechanism of aconitase: 1.8 Å resolution crystal**  
685 **structure of the S642A: citrate complex.** *Protein Science* 1999, **8**(12):2655-2662.
- 686 46. Lauble H, Kennedy M, Emptage M, Beinert H, Stout C: **The reaction of fluorocitrate with**  
687 **aconitase and the crystal structure of the enzyme-inhibitor complex.** *Proceedings of the*  
688 *National Academy of Sciences* 1996, **93**(24):13699-13703.
- 689 47. Lauble H, Kennedy MC, Beinert H, Stout CD: **Crystal structures of aconitase with trans-aconitate**  
690 **and nitrocitrate bound.** *Journal of molecular biology* 1994, **237**(4):437-451.
- 691 48. Robbins A, Stout C: **Structure of activated aconitase: formation of the [4Fe-4S] cluster in the**  
692 **crystal.** *Proceedings of the National Academy of Sciences* 1989, **86**(10):3639-3643.
- 693 49. Beinert H, Kennedy MC, Stout CD: **Aconitase as iron- sulfur protein, enzyme, and iron-**  
694 **regulatory protein.** *Chemical reviews* 1996, **96**(7):2335-2374.
- 695 50. Dupuy J, Volbeda A, Carpentier P, Darnault C, Moulis J-M, Fontecilla-Camps JC: **Crystal structure**  
696 **of human iron regulatory protein 1 as cytosolic aconitase.** *Structure* 2006, **14**(1):129-139.
- 697 51. Miller GC, Long CJ, Bojilova ED, Marchadier D, Badellino KO, Blanchard N, Fuki IV, Glick JM,  
698 Rader DJ: **Role of N-linked glycosylation in the secretion and activity of endothelial lipase.**  
699 *Journal of lipid research* 2004, **45**(11):2080-2087.
- 700 52. Skropeta D, Settasatian C, McMahon MR, Shearston K, Caiazza D, McGrath KC, Jin W, Rader DJ,  
701 Barter PJ, Rye K-A: **N-Glycosylation regulates endothelial lipase-mediated phospholipid**  
702 **hydrolysis in apoE- and apoA-I-containing high density lipoproteins.** *Journal of lipid research*  
703 2007, **48**(9):2047-2057.
- 704 53. Beinert H, Kennedy MC: **Aconitase, a two-faced protein: enzyme and iron regulatory factor.**  
705 *The FASEB journal* 1993, **7**(15):1442-1449.
- 706 54. Ferramosca A, Zara V: **Bioenergetics of mammalian sperm capacitation.** *BioMed research*  
707 *international* 2014, **2014**.
- 708 55. Lauble H, Stout CD: **Steric and conformational features of the aconitase mechanism.** *Proteins:*  
709 *Structure, Function, and Bioinformatics* 1995, **22**(1):1-11.

710 56. Imperiali B, O'Connor SE: **Effect of N-linked glycosylation on glycopeptide and glycoprotein**  
711 **structure**. *Current opinion in chemical biology* 1999, **3**(6):643-649.

712

713

714 **Figure Legends:**

715

716 **Figure 1.** Immunoblotting of mouse cauda sperm previously incubated in non-capacitating (N-  
717 Cap) or capacitating media supplemented (Cap-H) or not (Cap) with the PKA inhibitor H89.  
718 Protein extraction was performed in SDS-PAGE buffer and 10 µg was loaded per lane. Membranes  
719 were probed with anti-Phosphotyrosine PT66 antibody and then re-probed with anti- $\alpha$ -tubulin. The  
720 data show one replicate that has been repeated in 6 biological replicates.

721

722 **Figure 2.** Schematic representation of the strategy used to identify and quantify sialylated N-linked  
723 glycopeptides extracted from mouse sperm. Deamidated asparagine residue (-D).

724

725 **Figure 3.** Immunoblot analysis of cauda spermatozoa from mouse. Sperm samples were incubated  
726 in non-capacitating (N-Cap) or capacitating media supplemented (Cap-H) or not (Cap) with the  
727 PKA inhibitor H89. Extraction was performed using SDS-PAGE buffer and 15 µg of protein was  
728 loaded per lane. **(A)** Membranes were probed with anti-EL and then **(B)** re-probed with anti- $\alpha$ -  
729 tubulin. **(C)** Graphic below shows relative immunoreactivity levels of both EL (left) and  $\alpha$ -tubulin  
730 (right). No statistical difference was observed among groups, which consist of five biological  
731 replicates each.

732

733 **Figure 4.** Immunofluorescent localization of EL and the corresponding phase-contrast  
734 micrographs of non-capacitated and capacitated mouse sperm cells. **(a-d')** Fixed spermatozoa were  
735 immobilized on pre-coated slides, permeabilized with ice cold methanol and incubated overnight  
736 with anti-EL antibody. Alexa Fluor 488-conjugated secondary antibody was used for detection of  
737 the primary antibody. Primary antibody was omitted in control (e and f). The scale bars represent  
738 20  $\mu$ m. The experiment was repeated using four biological replicates.

739

740 **Figure 5.** Assessment of acrosomal status by FITC-PNA labelling of non-capacitated (black and  
741 grey bars) and capacitated (hatched and dotted bars) mouse sperm either with (grey and dotted  
742 bars) or without (black and hatched bars) previous incubation with calcium ionophore A23187.  
743 Sperm were counted for intact, partial or complete acrosome reaction. The data were expressed as  
744 mean  $\pm$  SE. Different letters represent statistical differences ( $p < 0.01$ ) between treatments within  
745 each category (intact, partial or complete acrosome reaction). The graph represents the average of  
746 5 biological replicates.

747

748 **Figure 6.** Phospholipase A<sub>1</sub> (PLA<sub>1</sub>) activity and the effect of the addition of A23187 and the PKA  
749 inhibitor H89 on non- and capacitated mouse spermatozoa. Enzyme activity was measured using  
750 the fluorescent PED-A<sub>1</sub> substrate. **(A)** PLA<sub>1</sub> activity rate, within the first 10 min, for sperm cells  
751 previously incubated in non-capacitating or capacitating media with or without H89 and A23187.  
752 Image represents the mean value of five biological experiments. **(B)** Example of the raw data for  
753 two non-capacitated (solid line) and two capacitated (dotted line) samples.

754

755 **Figure 7.** Decrease in Aconitase activity during capacitation. Spermatozoa from mice were  
756 retrieved and incubated under non- or capacitating conditions. Following protein extraction,  
757 Aconitase activity was measured. To ensure equal amounts of Aconitase were present, the lysate  
758 was precipitated, run into SDS page, transferred and probed using anti-Aconitase antibody. The  
759 data shown is the average ( $\pm$  SD) of four biological replicates. Asterisk represents statistical  
760 significance ( $p < 0.01$ ).

761  
762 **Figure 8.** Following cloning and insertion of the Aconitase gene into plasmid, site directed  
763 mutagenesis was used to create the N612E mutant. **(A-D)** HEK293 cells were transiently  
764 transfected with GFP-tagged WT **(A,C)** or N612E mutant **(B,D)**. Both anti-GFP tag fluorescent  
765 **(A,B)** and phase **(C,D)** images were taken. Scale bar = 50  $\mu$ M. **(E-F)** Transfected cells were run  
766 through flow cytometer. Shown is the FL-1 channel vs counts of **(E)** GFP-tagged WT or **(F)** GFP-  
767 tagged N612E mutant. Arrow points to the mean signal intensity for each sample. Horizontal line  
768 represents the gate used for cell counting. **(G)** shows signal from non-transfected cells.

769  
770 **Figure 9.** HEK293 cells were transfected with either (His)<sub>6</sub>-tagged WT or (His)<sub>6</sub>-tagged N612E  
771 mutant for Aconitase. Cells were lysed and recombinant Aconitase purified on nickel beads.  
772 Following elution, samples were run and probed with **(G)** anti-(His)<sub>6</sub>-tagged protein or **(H)** anti-  
773 Aconitase. Control samples comprise non-transfected cells.

774



775 **Figure 10.** N612E-mutant Aconitase displays no activity. HEK293 cells were transiently  
 776 transfected with (His)<sub>6</sub>-tagged WT and (His)<sub>6</sub>-tagged N612E mutant. Aconitase was purified over  
 777 nickel beads, run in SDS-PAGE and the immunoblotting performed to ensure that equal amounts  
 778 of protein were used. Bars demonstrate the average (n=6) activity of Aconitase with SD. Non-  
 779 transfected cells were used as controls.

780 **Figure 11.** (A) Ball and stick together with (B) ribbon model of aconitase. The different amino  
 781 acids are labelled as shown. The purple dotted line represents hydrogen bonding. Shown is sialic  
 782 acid docked onto asparagine 612.

783

784 **Table 1.** List of sialylated N-glycopeptides identified in non-capacitated and capacitated mouse  
 785 sperm and their regulation during the process of capacitation.

786

| Protein ID                                      | Peptide sequence                                 | Masco<br>t score | Fold<br>chang<br>e | p Value | MS/<br>MS<br>(suppl<br>1) |
|-------------------------------------------------|--------------------------------------------------|------------------|--------------------|---------|---------------------------|
|                                                 | K.EADNFFFTSLGLLPVPPEFW <u>NK.S</u>               | 42.9             | ND                 | ND      | 1                         |
| Angiotensin-converting<br>enzyme                | K.LITGQP <u>NMS</u> ASAMMNYFKPLTE<br>WLVTENR.R * | 40.7             | ND                 | ND      | 2                         |
|                                                 | K.STEVS <u>NHTL</u> K.Y                          | 54.0             | -1.09              | 0.063   | 3                         |
|                                                 | K.TFDVSNFQ <u>NSSI</u> K.R                       | 76.9             | -1.34              | 0.074   | 4                         |
| Aconitate hydratase,<br>mitochondrial precursor | R.GHLD <u>NIS</u> NNLLIGAINIENGK.A *             | 67.8             | 2.04               | 0.016   | 5                         |
| Acrosin precursor                               | R.VDLIDLDC <u>NST</u> QWYNGR.V                   | 128.0            | -1.15              | 0.113   | 6                         |

|                                                     |                                                 |       |       |       |    |
|-----------------------------------------------------|-------------------------------------------------|-------|-------|-------|----|
| ADAM 26A                                            | R.KEKNECDLPEWC <u>NGT</u> SAECPGD<br>VYK.A      | 80.8  | -1.32 | 0.243 | 7  |
| ADAM 24                                             | K.LS <u>NCS</u> YEVLWAHM <u>NK.S</u>            | 49.5  | ND    | ND    | 8  |
| ADAM 2 precursor                                    | R.AFS <u>NCS</u> MEDFSK.F                       | 85.7  | ND    | ND    | 9  |
|                                                     | R. <u>NTT</u> DYVGATYQGK.M                      | 56.0  | ND    | ND    | 10 |
| ADAM 5                                              | K.A <u>NLS</u> VAYAQIR.D                        | 80.8  | 1.09  | 0.314 | 11 |
| ADAM 1b                                             | K.EGDVCRPADGPCDLEEYC <u>NGT</u> S<br>AACPSDR.K  | 82.6  | -1.52 | 0.081 | 12 |
| Anthrax toxin receptor-like                         | K.DFYQV <u>NIS</u> GHGL <u>NNT</u> SNMK.Q *     | 62.2  | 1.53  | 0.162 | 13 |
| Beta-2-glycoprotein 1 precursor                     | K.DYRPSAG <u>NNS</u> LYQDTVVFK.C                | 59.2  | 1.12  | 0.264 | 14 |
|                                                     | K. <u>NIS</u> FACNPGFFL <u>NGT</u> SSSK.C *     | 116.5 | 2.06  | 0.163 | 15 |
| Sodium/potassium-transporting ATPase subunit beta-3 | K.EE <u>NATI</u> ATYPEFGVLDLK.Y                 | 85.2  | -1.27 | 0.162 | 16 |
| Basigin precursor                                   | K.SQLTISNLDVNVDPGTYVC <u>NATN</u><br>AQGTTR.E * | 63.4  | 1.19  | 0.063 | 17 |
|                                                     | K.TSDTGEEEAIT <u>NST</u> EANGK.Y                | 151.1 | -1.35 | 0.090 | 18 |
| Bactericidal permeability-increasing protein        | K.T <u>NAS</u> LEVDAEENR.L                      | 92.0  | -1.27 | 0.214 | 19 |
| C4b-binding protein                                 | K.ALCQKPEVG <u>NGT</u> LSDEK.D                  | 52.8  | -1.30 | 0.233 | 20 |
|                                                     | R.CEQEASEDLKPALT <u>GNK.T</u>                   | 43.1  | ND    | ND    | 21 |
|                                                     | R.LACL <u>NGT</u> IVLR.G                        | 76.8  | -3.62 | 0.009 | 22 |
| Carbonic anhydrase 4 precursor                      | R.Y <u>NGSL</u> TTPNCDETVIWTVYK.Q               | 88.6  | 1.71  | 0.088 | 23 |
| Carboxypeptidase A5 precursor                       | K.AGFGG <u>NGS</u> NKNPCSETYR.G *               | 40.3  | ND    | ND    | 24 |
| Carboxypeptidase Q                                  | K.EVMNLLQPL <u>NVT</u> K.V                      | 80.1  | 1.43  | 0.266 | 25 |

|                                                                   |                                                      |       |       |       |    |
|-------------------------------------------------------------------|------------------------------------------------------|-------|-------|-------|----|
| CD109 antigen homolog precursor                                   | R.FLV TAPGIIRPGAN <u>VT</u> IGVDLLEN<br>SPPQVLVK.A * | 51.9  | -2.03 | 0.084 | 26 |
| CD151 antigen                                                     | K.LQQEFHCCGS <u>NNS</u> QDWQDSEWI<br>R.S             | 85.7  | -1.03 | 0.466 | 27 |
| CD59B glycoprotein                                                | K. <u>INTT</u> CSPNLDSCLYAVAGR.Q                     | 89.4  | 1.02  | 0.466 | 28 |
| Clusterin precursor                                               | K.AFPEVC <u>NET</u> MMALWEECKPCLK<br>.H *            | 46.9  | -2.55 | 0.164 | 29 |
|                                                                   | R.QEL <u>NDS</u> LQVAER.L                            | 72.9  | ND    | ND    | 30 |
| Choline transporter-like protein 5                                | R.CIPDLSAL <u>NGT</u> WTPGSR.M                       | 84.3  | 1.11  | 0.312 | 31 |
| Cation channel sperm-associated protein subunit gamma 2           | K.LY <u>NMSG</u> DYGIPDLFFLDK.G                      | 63.9  | -1.30 | 0.163 | 32 |
|                                                                   | R.GVD <u>NSTY</u> CDYK.L                             | 73.8  | ND    | ND    | 33 |
| Cation channel sperm-associated protein subunit beta              | K.TPVYNPLGL <u>NLT</u> IQGSELFHFK.V<br>*             | 66.5  | ND    | ND    | 34 |
| CUB and zona pellucida-like domain-containing protein 1 precursor | K.ALVLQLSANEN <u>CT</u> WTIERPEN <u>RS</u><br>*      | 122.2 | -1.72 | 0.181 | 35 |
|                                                                   | K.GFSASYTSIYIHDV <u>NTT</u> SLSCVSD<br>K.M           | 89.8  | 1.77  | 0.146 | 36 |
| Dickkopf-like protein 1 precursor                                 | K.VTD <u>NOT</u> GEVLISEK.V                          | 79.2  | 1.04  | 0.460 | 37 |
| Dipeptidase 3 precursor                                           | R.HHFYTN <u>IS</u> GLTSFG EK.V                       | 101.5 | -1.30 | 0.122 | 38 |
|                                                                   | R.MCSAYPELELVTSADGL <u>NNT</u> QK.<br>L              | 150.4 | -1.08 | 0.434 | 39 |
| Embigin precursor                                                 | K.KDDEPLETTGDF <u>NTT</u> K.M                        | 75.9  | 1.42  | 0.338 | 40 |
|                                                                   | K.YI <u>NGSHAN</u> ETR.L                             | 68.4  | ND    | ND    | 41 |
| Endoplasmin precursor                                             | K.HN <u>NDT</u> QHIWESDSNEFSVIADPR.<br>G *           | 93.0  | -3.89 | 0.200 | 42 |

|                                                                     |                                                            |              |             |             |          |
|---------------------------------------------------------------------|------------------------------------------------------------|--------------|-------------|-------------|----------|
|                                                                     | R.TDDEVVQREEEAIQLDGL <u>NAS</u> QI<br>R.E                  | 85.2         | ND          | ND          | 43       |
| Equatorin                                                           | K.AV <u>NET</u> AVSMDDK.D                                  | 96.8         | -1.29       | 0.145       | 44       |
|                                                                     | K.DQFFQPIPASDL <u>NAT</u> NEDK.L                           | 101.8        | 1.23        | 0.241       | 45       |
| Carboxylesterase 5A                                                 | K.HDLQVVANVDCDC <u>NV</u> SDSK.A                           | 103.1        | -1.43       | 0.323       | 46       |
| Interferon-induced guanylate-binding protein 1                      | K.LQEQRLLKQGFQ <u>NES</u> LQLR.Q                           | 42.0         | -1.22       | 0.201       | 47       |
| Glycerophosphodiester phosphodiesterase domain-containing protein 4 | K.EVLPSAAG <u>NHT</u> SNF <u>NWT</u> FLLSTLN<br>AGK.W *    | 91.7         | -1.02       | 0.469       | 48       |
| Gamma-glutamyltranspeptidase 1 precursor                            | R.LAN <u>TTM</u> F <u>NNS</u> K.D                          | 56.2         | ND          | ND          | 49       |
| Gamma-glutamyltransferase 7                                         | R.TA <u>NHS</u> APLENSVQPGK.R                              | 49.2         | ND          | ND          | 50       |
| Beta-galactosidase-1-like protein                                   | R.CGSLQGLYTTIDFGPAD <u>NV</u> TR.I *                       | 45.6         | ND          | ND          | 51       |
| Solute carrier family 2, facilitated glucose transporter member 3   | K.DFL <u>NYT</u> LEER.L                                    | 69.6         | -1.10       | 0.271       | 52       |
| Hexokinase-1                                                        | K.SQ <u>NVS</u> MESEVYDTPENIVHGSGS<br>QLFDHVAECLGDFMEK.R * | 94.2         | ND          | ND          | 53       |
| Hyaluronidase PH-20 precursor                                       | K.VG <u>NAS</u> DPVPIFVYIR.L                               | 60.6         | -1.53       | 0.102       | 54       |
| Hypoxia up-regulated protein 1                                      | R.AEPPL <u>NAS</u> AGDQEEK.V<br>R.VFGSQ <u>NLT</u> TVK.L   | 61.0<br>76.2 | -4.07<br>ND | 0.165<br>ND | 55<br>56 |
| Izumo sperm-egg fusion protein 1 precursor                          | R.VWEN <u>SSE</u> TLIAK.G                                  | 85.7         | -1.24       | 0.129       | 57       |
| Casein kinase I isoform gamma-2                                     | K.NQAL <u>NST</u> NGELNTDDPTAGHSN<br>APIAAPAEVEVADETK.C *  | 92.2         | -1.32       | 0.210       | 58       |
| Laminin subunit alpha-1 precursor                                   | K.LDELK <u>NLT</u> SQFQESVD <u>NIT</u> K.Q *               | 50.0         | ND          | ND          | 59       |

|                                                       |                                                      |       |       |       |    |
|-------------------------------------------------------|------------------------------------------------------|-------|-------|-------|----|
| Lysosome-associated membrane glycoprotein 1 precursor | R.AFNIS <b>NDT</b> SSGSCGINLVTLK.V<br>*              | 61.4  | -3.42 | 0.113 | 60 |
|                                                       | R.L <b>NMT</b> LPDALVPTFSIS <b>NHSLK</b> .A *        | 65.8  | ND    | ND    | 61 |
| Epididymal-specific lipocalin-8 precursor             | K.AVY <b>NSSG</b> SCVTESSLGSER.D                     | 109.7 | -1.41 | 0.162 | 62 |
| Endothelial lipase                                    | K.DPEQEGC <b>NLS</b> LGDSK.L *                       | 79.3  | ND    | ND    | 63 |
|                                                       | K.IEL <b>NAT</b> NTFLVYTEEDLGDLLK.M                  | 71.2  | ND    | ND    | 64 |
|                                                       | K.LLENCGF <b>NMT</b> AK.T                            | 62.7  | -1.33 | 0.011 | 65 |
| Lipid phosphate phosphohydrolase 1                    | K. <b>INCS</b> DGYIEDYICQGNEEK.V                     | 120.3 | 1.06  | 0.359 | 66 |
| Leucine-rich repeat-containing protein 52 precursor   | K.YVFAN <b>TT</b> SLR.Y                              | 52.5  | ND    | ND    | 67 |
|                                                       | R.L <b>NIS</b> HNPHELLYLDK.Y                         | 40.6  | ND    | ND    | 68 |
| Ly6/PLAUR domain-containing protein 4 precursor       | K.FQAGNL <b>NTT</b> FLIMGCAR.D                       | 118.3 | 1.14  | 0.299 | 69 |
|                                                       | R.SYLCN <b>NLT</b> NLEPFVR.L *                       | 76.6  | -1.19 | 0.270 | 70 |
| Lysosomal alpha-mannosidase                           | R.DDYRPTWTL <b>NOT</b> EPVAGNYYPV<br>NTR.I *         | 49.0  | ND    | ND    | 71 |
|                                                       | K.QFF <b>NAS</b> VQFDNMDPLLDYINQR.<br>T *            | 57.0  | -2.59 | 0.155 | 72 |
| Epididymis-specific alpha-mannosidase precursor       | K.Y <b>NLT</b> L <b>NDT</b> SIVHPVLWMLGPK.<br>S      | 89.7  | 1.23  | 0.243 | 73 |
| Membrane cofactor protein precursor                   | K. <b>NGT</b> HTLTDINVK.Y                            | 54.3  | 1.05  | 0.384 | 74 |
| Mitochondria-eating protein                           | R.DNSPDQDQHQS <b>DNES</b> FSETQPTQ<br>VQDDLAESGK.S * | 61.5  | -1.69 | 0.127 | 75 |
|                                                       | K.NGNMLDWWS <b>NFS</b> AR.H                          | 63.0  | -1.91 | 0.118 | 76 |
| Membrane metallo-endopeptidase-like 1                 | R.EEMAEVLELETHLAN <b>NAT</b> VTPQEK.<br>R            | 56.9  | -1.24 | 0.362 | 77 |

|                                                             |                                                 |       |       |       |    |
|-------------------------------------------------------------|-------------------------------------------------|-------|-------|-------|----|
|                                                             | R.VLIDLFIWNDDQ <u>NSSR</u> .H                   | 58.9  | ND    | ND    | 78 |
| Ecto-ADP-ribosyltransferase<br>3                            | R.KGTSNDLVLQSI <u>NST</u> CSYYECAFL<br>GGLK.T * | 86.0  | -1.18 | 0.320 | 79 |
|                                                             | R.LG <u>NFT</u> LAYSAKPETADNQR.V *              | 112.9 | 1.19  | 0.079 | 80 |
| Nicastrin                                                   | K.DLYEYSWVQGPWNS <u>NR.T</u> *                  | 45.9  | ND    | ND    | 81 |
| L-amino-acid oxidase<br>precursor                           | K.VVTLGL <u>NR.T</u>                            | 55.6  | -1.34 | 0.138 | 82 |
|                                                             | R.TLGL <u>NLT</u> QFTQYDENTWTEVHN<br>VK.L       | 97.3  | -1.10 | 0.418 | 83 |
| Nuclear pore membrane<br>glycoprotein 210-like<br>precursor | K.CFP <u>NSS</u> VIEEDGGGLR.S                   | 99.7  | -1.16 | 0.352 | 84 |
|                                                             | K.EYFEEQLSTS <u>NGS</u> YHVVK.A                 | 44.4  | -1.90 | 0.069 | 85 |
|                                                             | K.SS <u>NET</u> LAHFEDSK.S                      | 83.2  | -1.38 | 0.051 | 86 |
|                                                             | R.EVVV <u>NASSR</u> .L                          | 58.7  | 1.01  | 0.470 | 87 |
|                                                             | R.G <u>NST</u> ILAR.D                           | 68.4  | -1.78 | 0.179 | 88 |
|                                                             | R.ILIPFIPGFYM <u>NOSE</u> FVLGHK.D              | 45.3  | -1.05 | 0.467 | 89 |
|                                                             | R.KFD <u>NFSS</u> LMLEWK.S                      | 66.6  | -1.10 | 0.315 | 90 |
| Lysosomal Pro-X<br>carboxypeptidase precursor               | K. <u>NIS</u> SHSNIIFSNGELDPWGGGVT<br>R.D *     | 91.7  | ND    | ND    | 91 |
| Protein disulfide-isomerase-<br>like protein of the testis  | K.ALLF <u>NNS</u> DEVADFK.S                     | 82.0  | -2.69 | 0.235 | 92 |
| Phospholipase B1,<br>membrane-associated                    | K.AE <u>NLT</u> SQVR.T                          | 73.6  | 1.11  | 0.268 | 93 |
|                                                             | K.NSNL <u>GNT</u> WWMVCEER.A                    | 89.7  | -1.67 | 0.053 | 94 |
|                                                             | K.TLE <u>NVT</u> TLPNLR.K                       | 42.1  | 1.00  | 0.499 | 95 |
|                                                             | R.D <u>NFT</u> VVVQPLFEN <u>VSM</u> PR.T *      | 58.5  | ND    | ND    | 96 |
|                                                             | R.HSQ <u>NLT</u> AMQELK.K                       | 78.2  | -1.38 | 0.153 | 97 |
|                                                             | R.DQG <u>NVT</u> DMASK.Y                        | 89.4  | -1.10 | 0.326 | 98 |

|                                                                           |                                                                                |              |                |                |            |
|---------------------------------------------------------------------------|--------------------------------------------------------------------------------|--------------|----------------|----------------|------------|
| Putative phospholipase B-like 1                                           | R.FNETLHR.G                                                                    | 49.8         | -1.23          | 0.200          | 99         |
| Prominin-1 precursor                                                      | K.DALQNMSSSLK.S                                                                | 50.1         | ND             | ND             | 100        |
|                                                                           | K.SLQDAATQLNTNLSSVR.N                                                          | 121.1        | -1.46          | 0.244          | 101        |
| Inactive serine protease 39                                               | R.ILLGYNQLSNPSNYSR.Q                                                           | 104.5        | -2.00          | 0.001          | 102        |
| Serine protease 42                                                        | K.LQHPVNFTTNIYPVCIPSESPVK.<br>A *                                              | 84.1         | 1.22           | 0.217          | 103        |
| Serine protease 44                                                        | K.GGDACQGDSGGPLVCEFNK.T                                                        | 97.1         | -1.61          | 0.067          | 104        |
| Serine protease 46                                                        | K.VGVQTLPDNSTSELLVTR.I                                                         | 100.3        | 1.15           | 0.349          | 105        |
| Serine protease 52                                                        | R.NCWVTGWGITNTSEK.G                                                            | 101.7        | -3.09          | 0.003          | 106        |
| Prostaglandin-H2 D-isomerase precursor                                    | K.TVVAPSTEGGLNLTSTFLR.K                                                        | 141.6        | -1.42          | 0.279          | 107        |
| Patched domain-containing protein 3                                       | K.VVQENGTQILYQEVCAK.Y<br>R.FVQGHFSTNDTYR.F                                     | 94.7<br>60.9 | 1.14<br>-1.17  | 0.192<br>0.324 | 108<br>109 |
| Pituitary tumor-transforming gene 1 protein-interacting protein precursor | R.VGCSEYTNRS.S                                                                 | 59.5         | -1.02          | 0.432          | 110        |
| RING finger protein 126                                                   | R.NTENGSAPSTAPTDQNR.Q                                                          | 75.4         | ND             | ND             | 111        |
| Solute carrier family 13 member 5                                         | R.AMFNLDNFPDWANSTSVNT.-                                                        | 100.3        | 1.03           | 0.472          | 112        |
| Solute carrier family 22 member 21                                        | R.IPDTVNLSSAWR.N<br>R.LATIANFSELGLEPGR.D                                       | 91.2<br>96.2 | -1.09<br>-1.11 | 0.201<br>0.282 | 113<br>114 |
| Sperm acrosome membrane-associated protein 1 precursor                    | K.LLKPDQQPVILTNDSAVLEITR.E                                                     | 138.6        | 1.38           | 0.258          | 115        |
| Saccharopine dehydrogenase-like oxidoreductase                            | K.ACIENGTSCIDICGEPQFLELMHA<br>K.Y<br>R.NQMNGTLTAVESFLTINTGPEGL<br>CIHDGTWK.S * | 81.0<br>91.5 | ND<br>ND       | ND<br>ND       | 116<br>117 |

|                                                           |                                                    |       |       |       |     |
|-----------------------------------------------------------|----------------------------------------------------|-------|-------|-------|-----|
| Sortilin precursor                                        | R.HLYTTTGGGETDFT <b>NVT</b> SLR.G                  | 62.3  | -2.18 | 0.053 | 118 |
| Kunitz-type protease inhibitor 4                          | R.FFY <b>NQT</b> AK.Q                              | 42.0  | -1.09 | 0.317 | 119 |
| Signal peptide peptidase-like 2B                          | K.SGNSIMVEVATGPS <b>NSS</b> THEK.L                 | 87.6  | 1.18  | 0.290 | 120 |
| Suppressor of G2 allele of SKP1 homolog                   | R.CQEIQ <b>NGS</b> ESEVSASQR.T                     | 84.2  | ND    | ND    | 121 |
| Synaptophysin-like protein 1                              | K. <b>NOT</b> VTATFGYPFR.L                         | 89.3  | -1.29 | 0.154 | 122 |
| Testisin precursor                                        | K.LSSPVTYNNFIQPICLL <b>NST</b> YK.F                | 94.7  | -1.35 | 0.194 | 123 |
| Testis-expressed sequence 29 protein                      | K.FAVCDIPLYDICDY <b>NVTR</b> .E                    | 101.0 | 1.02  | 0.448 | 124 |
| Transmembrane protease serine 12                          | R.EEG <b>NGT</b> TILQEAK.V                         | 43.0  | ND    | ND    | 125 |
| Testis-expressed protein 101 precursor                    | R.HCPTCVALGSCSSAPSMPCAN <b>GT</b><br>TQCYQGR.L     | 75.2  | -1.99 | 0.004 | 126 |
|                                                           | R.TF <b>NWTSK</b> .A                               | 48.7  | -1.91 | 0.001 | 127 |
|                                                           | R.VPETTATS <b>NMSGTR</b> .H                        | 93.3  | -2.01 | 0.001 | 128 |
| Ubiquitin carboxyl-terminal hydrolase 7                   | R.ITQNPVING <b>NVT</b> LSDGHSNAEED<br>MEDDTSWR.S * | 109.5 | ND    | ND    | 129 |
| Zonadhesin precursor                                      | K.CPLGTECKDSVDGGS <b>NCTK</b> .I                   | 51.9  | ND    | ND    | 130 |
|                                                           | K.DAQGDLIPAN <b>K.T</b>                            | 74.4  | -1.24 | 0.189 | 131 |
|                                                           | K.DGSS <b>NCT</b> NIPLQCPAHSR.Y                    | 93.0  | -1.14 | 0.183 | 132 |
|                                                           | K.FQCPSEYCKDIEDGNS <b>NCTR</b> .I                  | 43.0  | ND    | ND    | 133 |
|                                                           | K.TCTTLCTCSAHS <b>NIT</b> CSPTACK.A                | 52.2  | -1.04 | 0.236 | 134 |
|                                                           | R.VGSQSSGWM <b>NSSV</b> TIPK.G                     | 52.6  | -2.06 | 0.009 | 135 |
| Zona pellucida sperm-binding protein 3 receptor precursor | K.GVCLKPMVING <b>NLS</b> VER.V                     | 63.8  | 1.58  | 0.191 | 136 |
|                                                           | K.TYLFHGHEEN <b>STEHAMK</b> .G                     | 63.8  | -1.64 | 0.137 | 137 |



|                                            |                                                                   |       |       |       |     |
|--------------------------------------------|-------------------------------------------------------------------|-------|-------|-------|-----|
|                                            | R.ASLNDPQTVTCQEN <b><u>NLI</u></b> WSSTNGC<br>ERI                 | 137.3 | -1.03 | 0.357 | 138 |
|                                            | R.LALFTFP <b><u>NISETNVTNK.T</u></b> *                            | 95.9  | 1.27  | 0.191 | 139 |
|                                            | R.V <b><u>NSSHLS</u></b> CDEN <b><u>NGS</u></b> WVYSTFCAR.<br>K * | 75.1  | 1.08  | 0.281 | 140 |
| Zona pellucida-binding protein 1 precursor | R.DGTHCLQC <b><u>NNSL</u></b> VYGAK.T *                           | 104.7 | 1.02  | 0.435 | 141 |
| Zona pellucida-binding protein 2           | K.GNSQ <b><u>INIT</u></b> NTGELVLK.D *                            | 76.5  | 1.70  | 0.145 | 142 |

- 787
- 788 \* ambiguous localization of deamidated residue.
- 789 Consensus sequence for N-glycosylation is shown underlined and in boldface.
- 790 Numbers in MS/MS column correspond to page in supplementary I which contains MS/MS
- 791 spectrum of the glycopeptides.
- 792 ND (not determined) is used when the area under the curve could not be measured in all samples.

Fig. 1

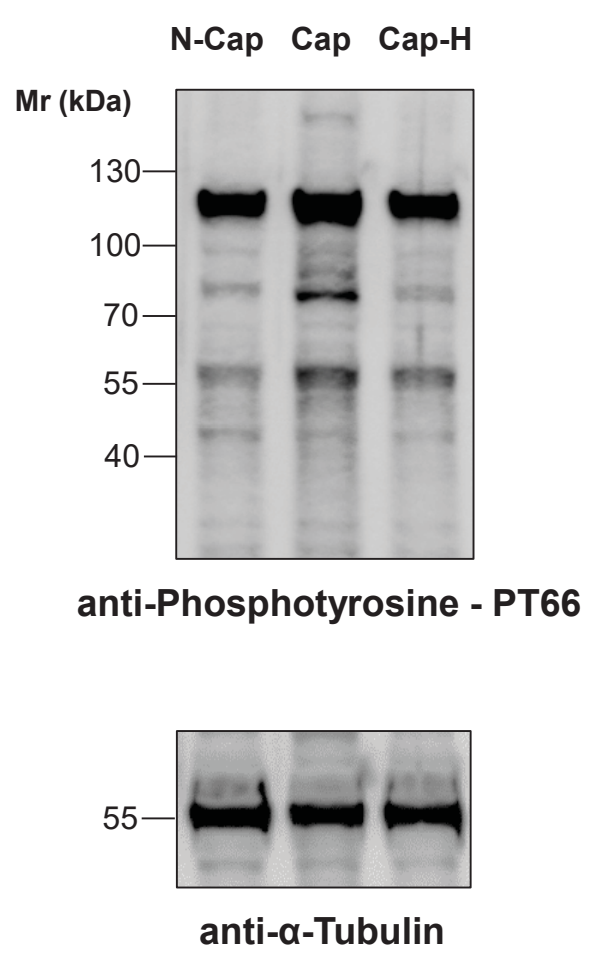

Fig. 2

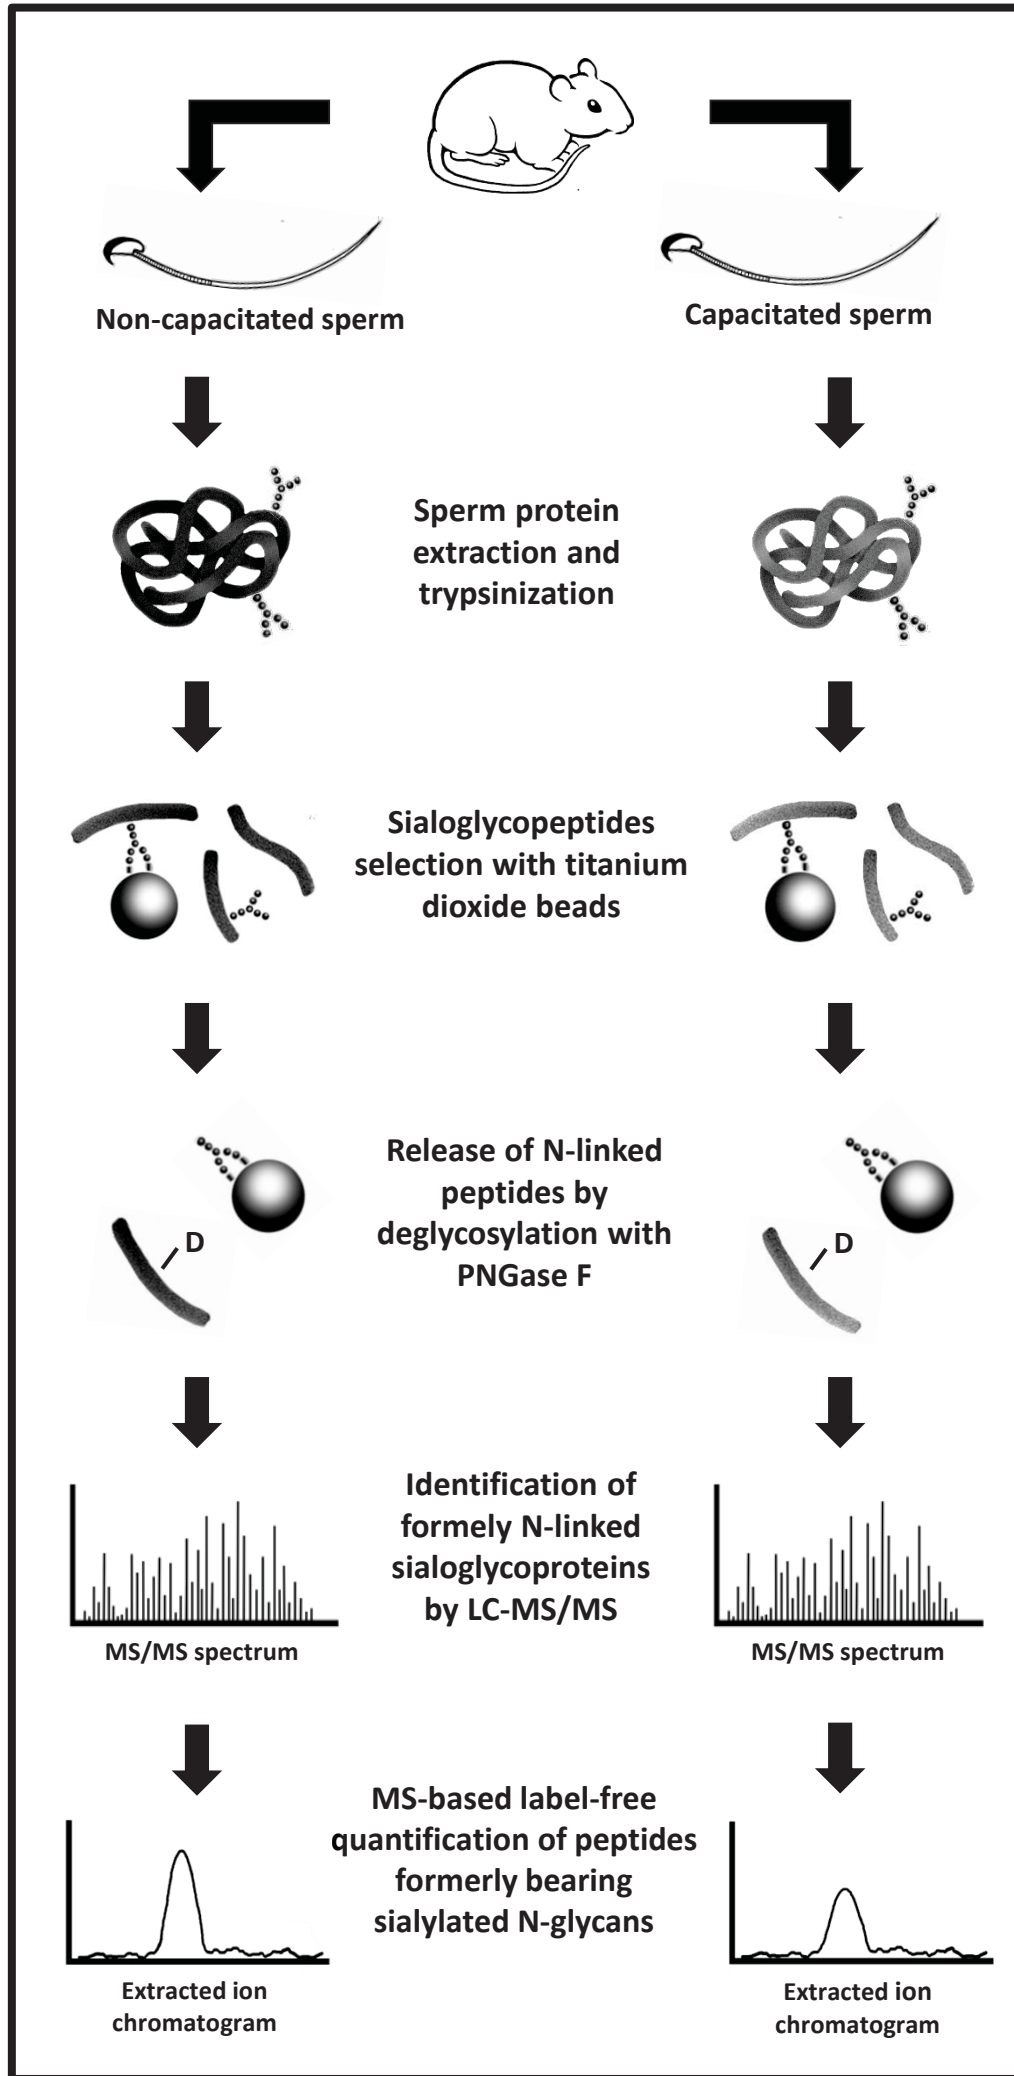

Fig. 3

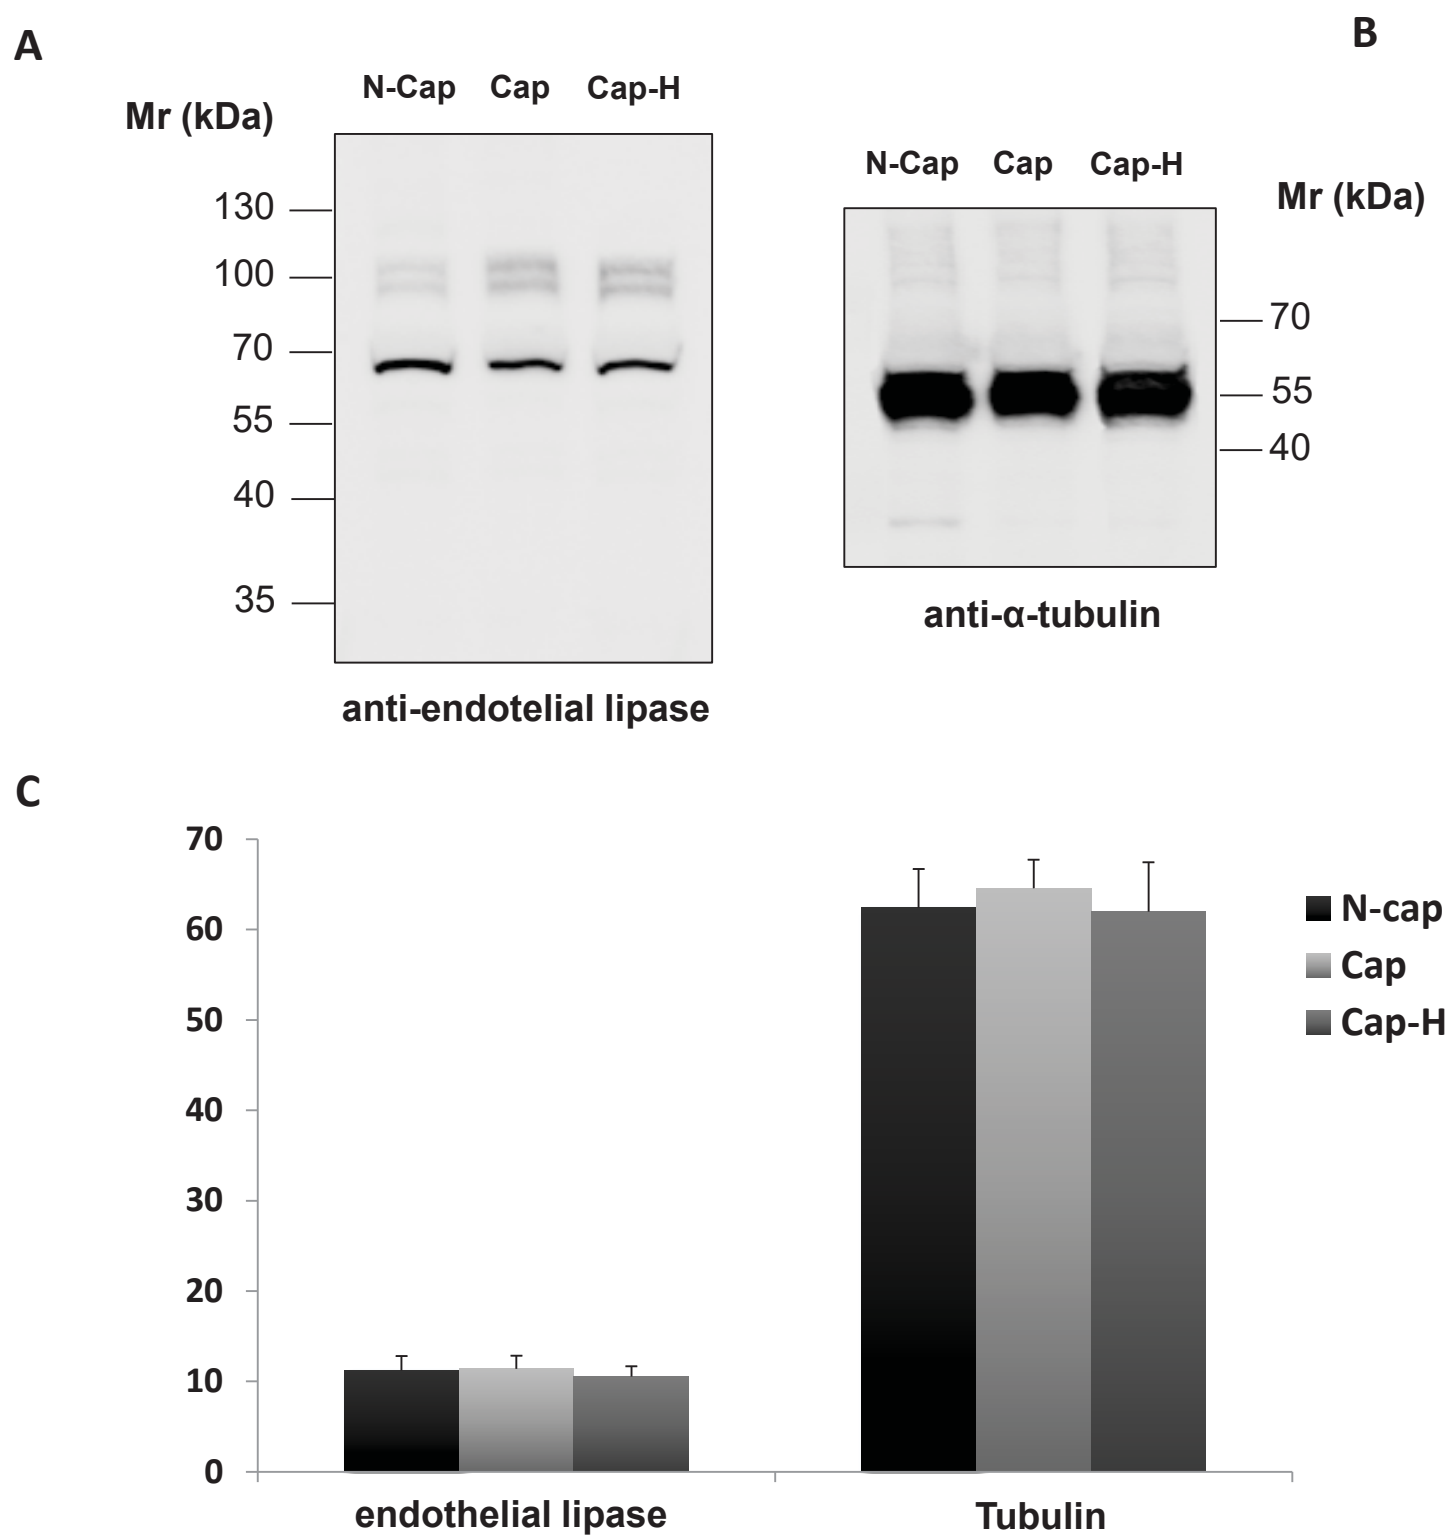

Fig. 4

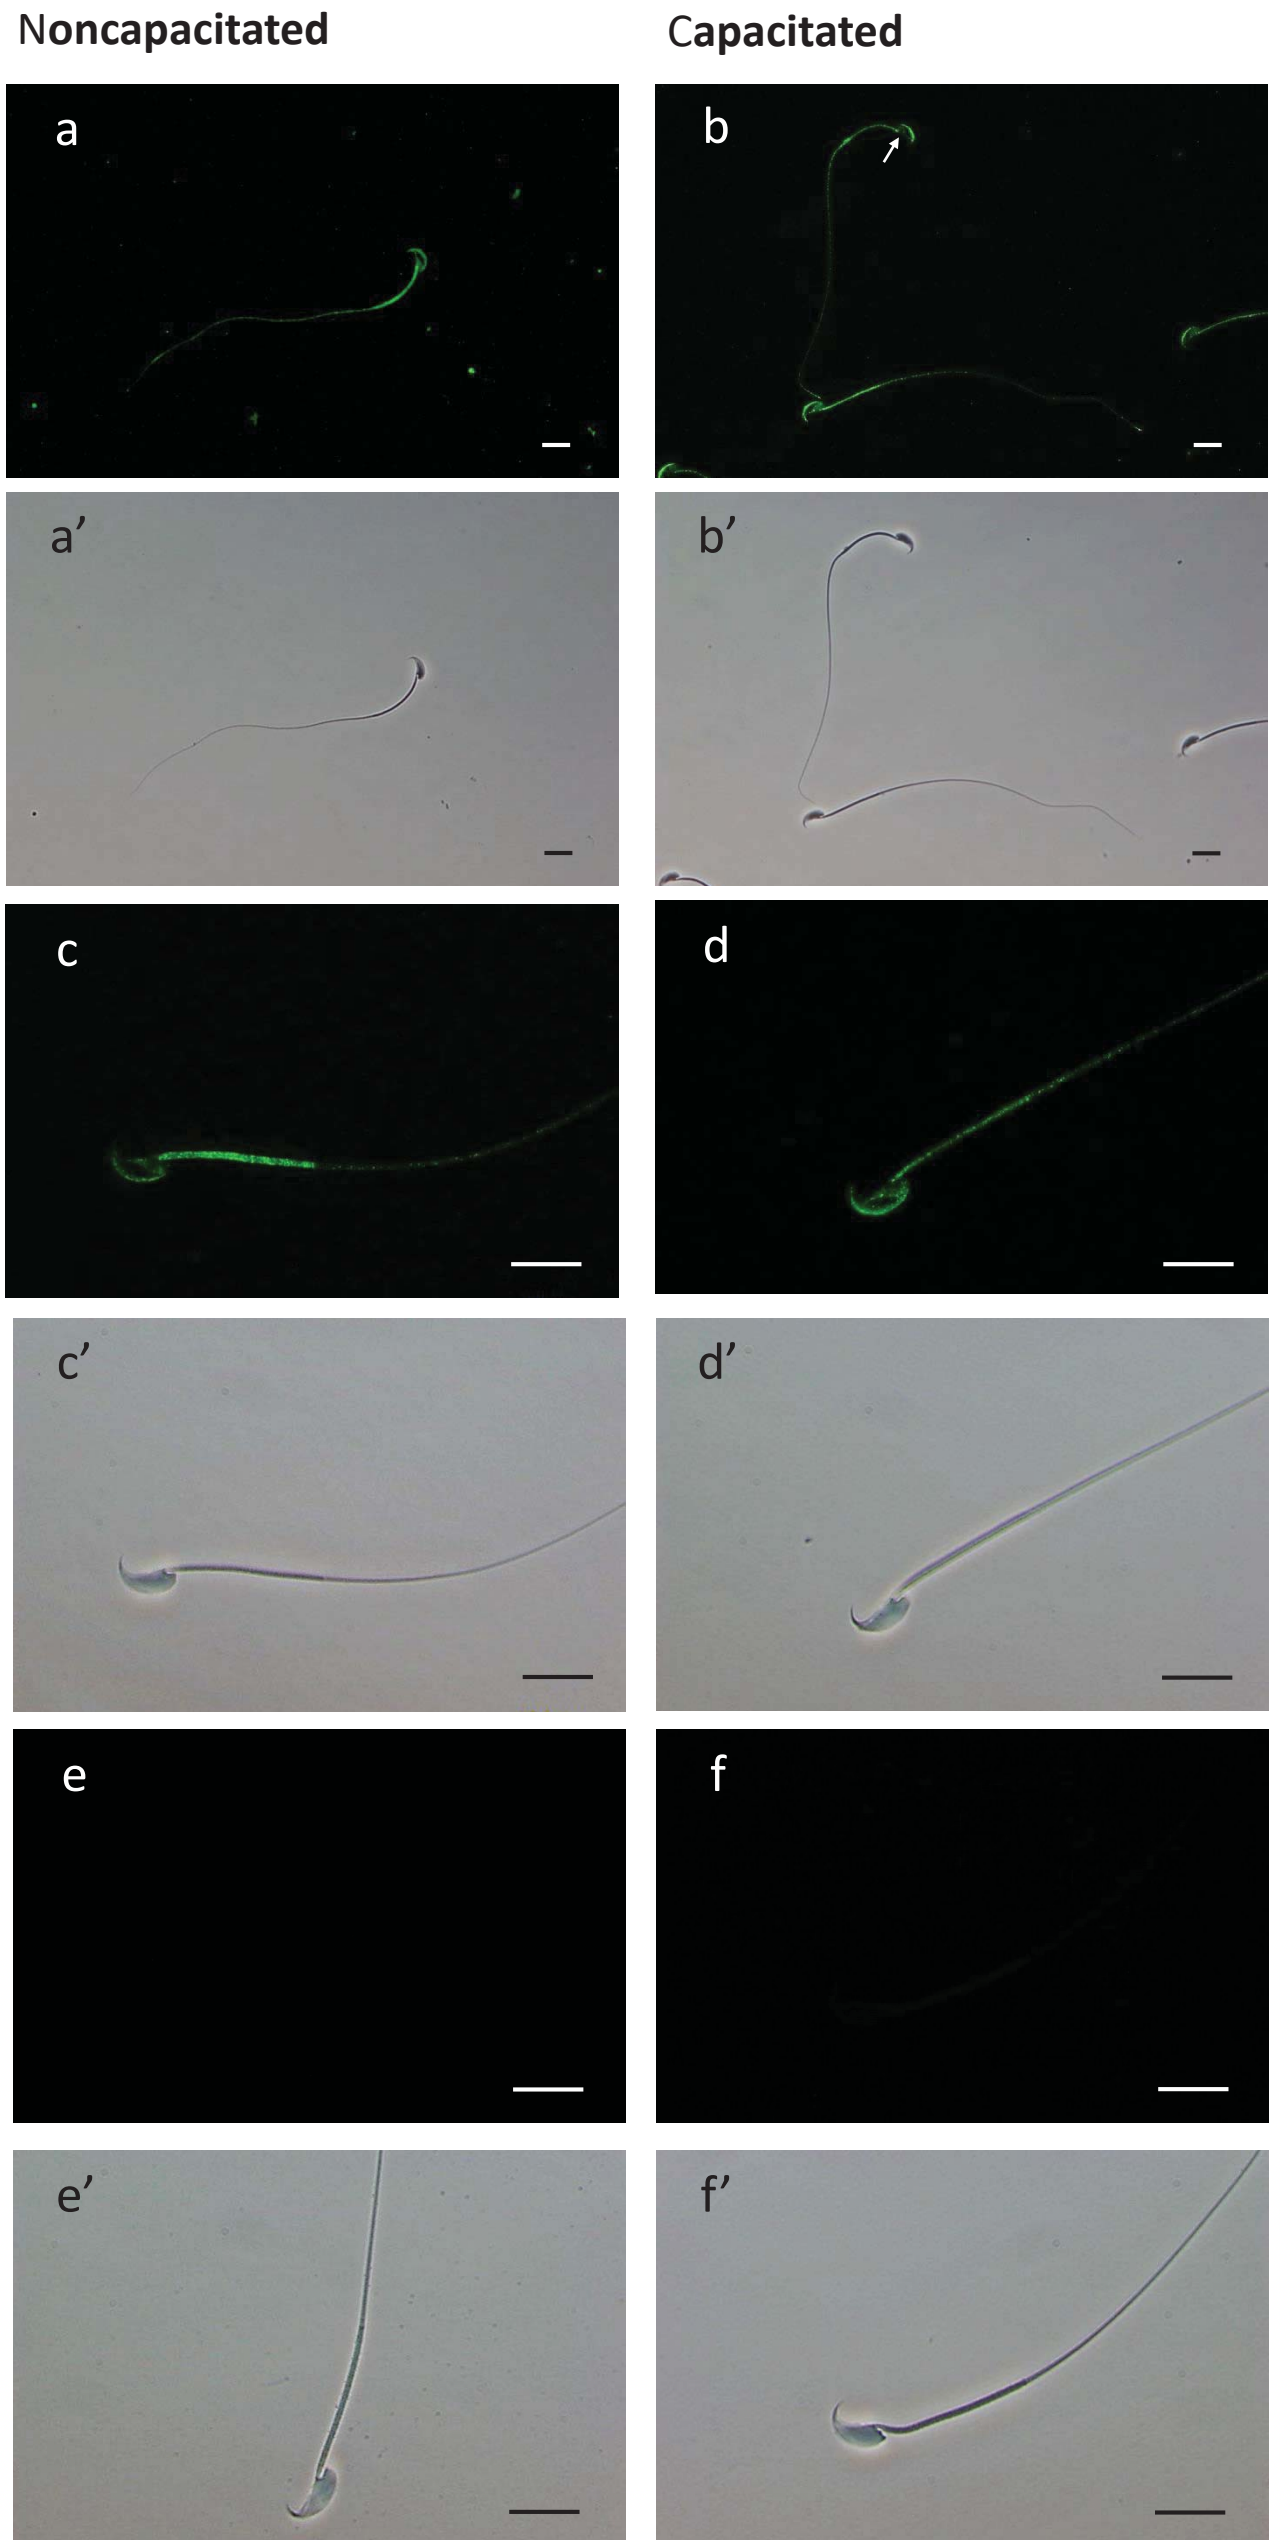

Fig. 5

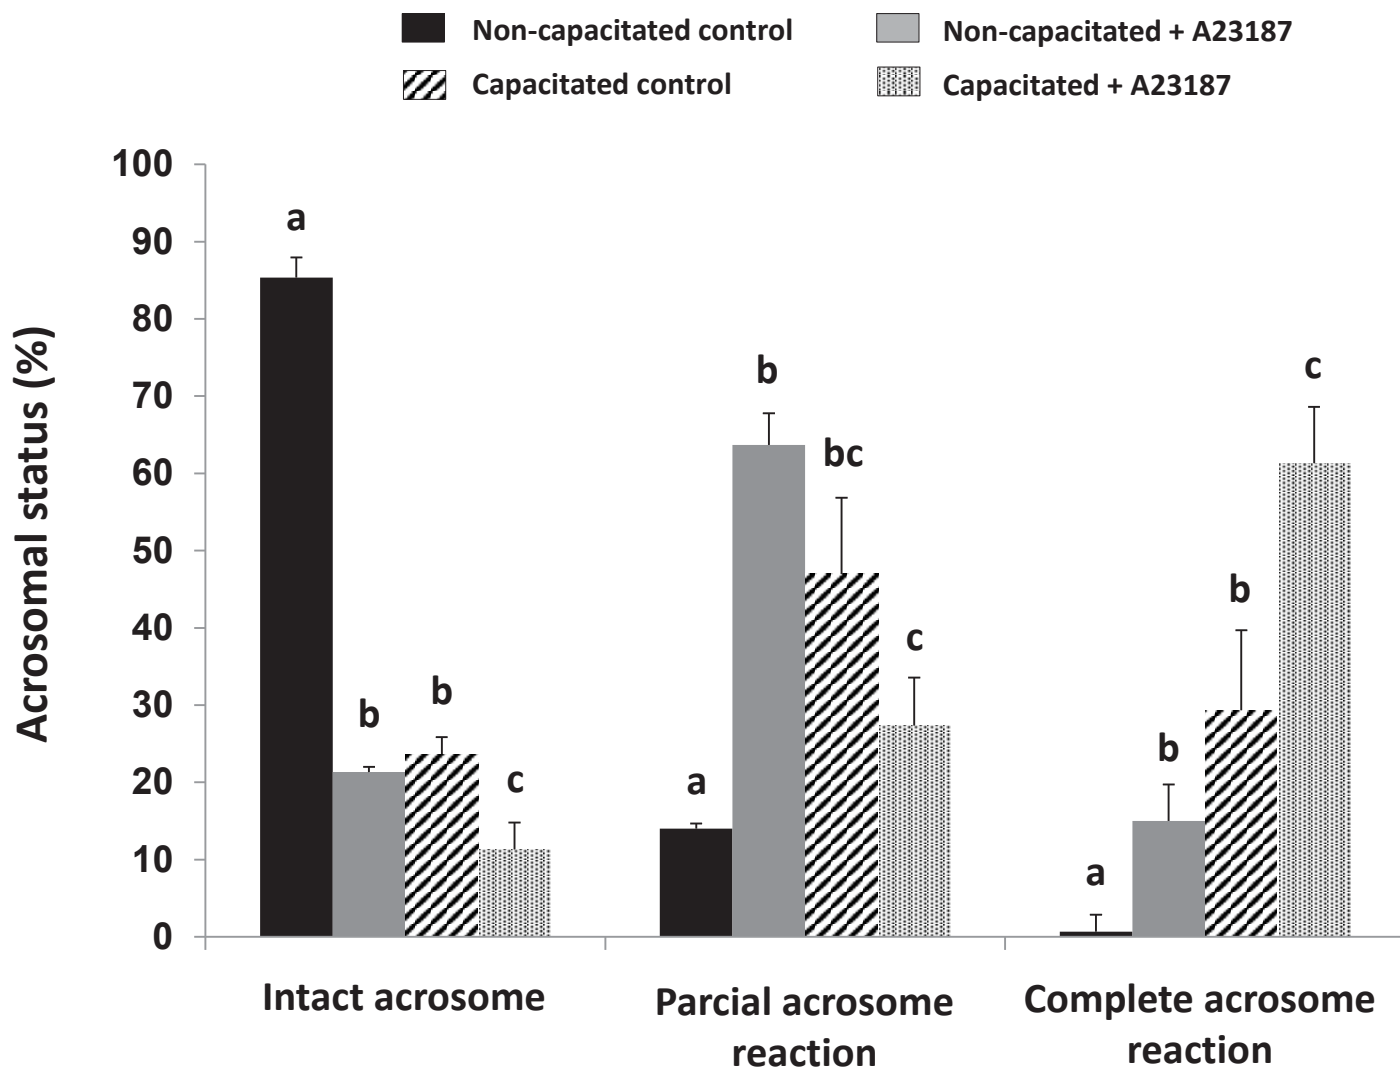

Fig. 6

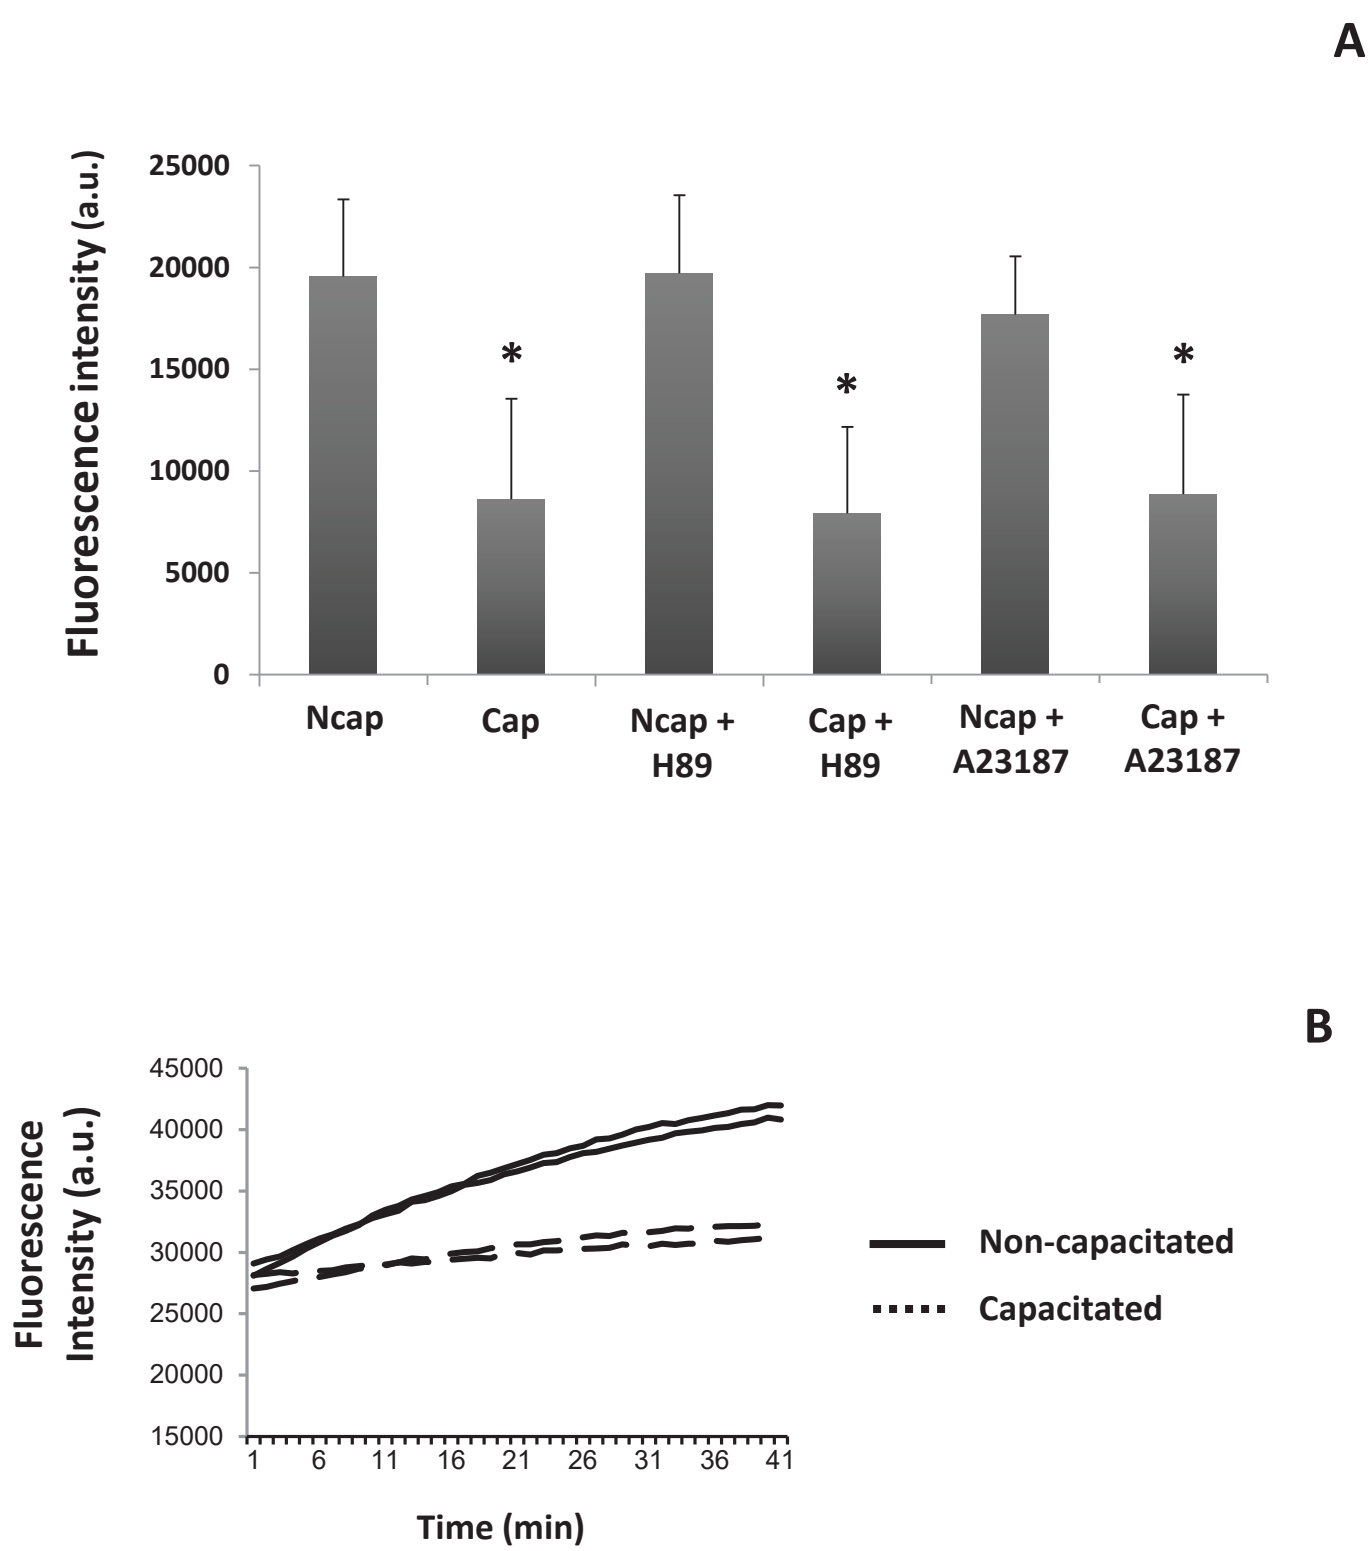

Fig. 7

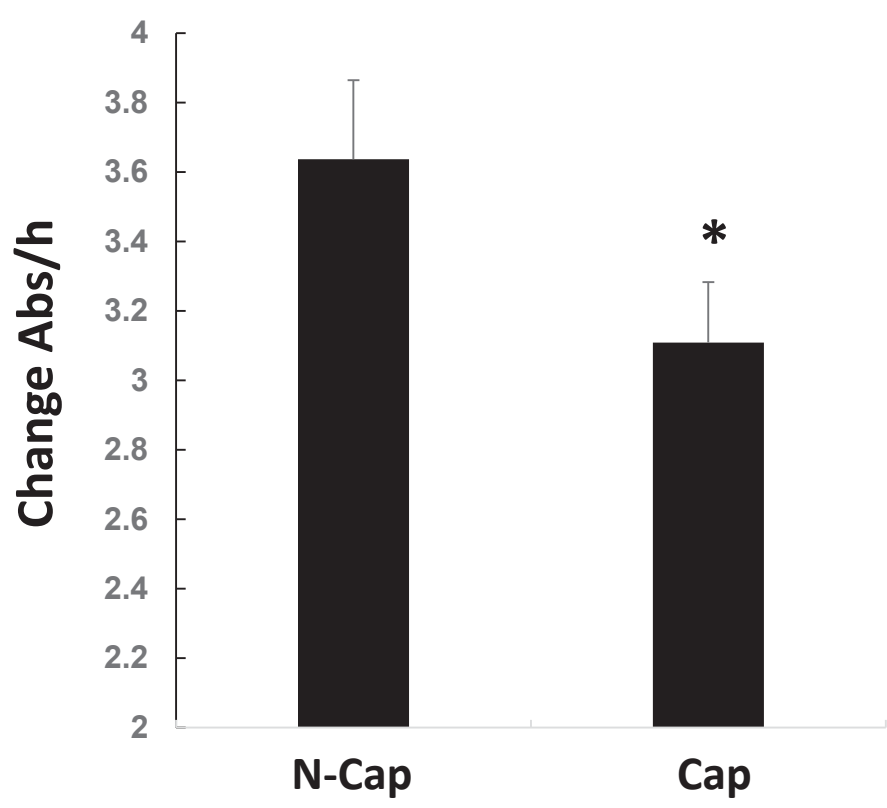



Fig. 8

Wild-type Aconitase

N612E Aconitase

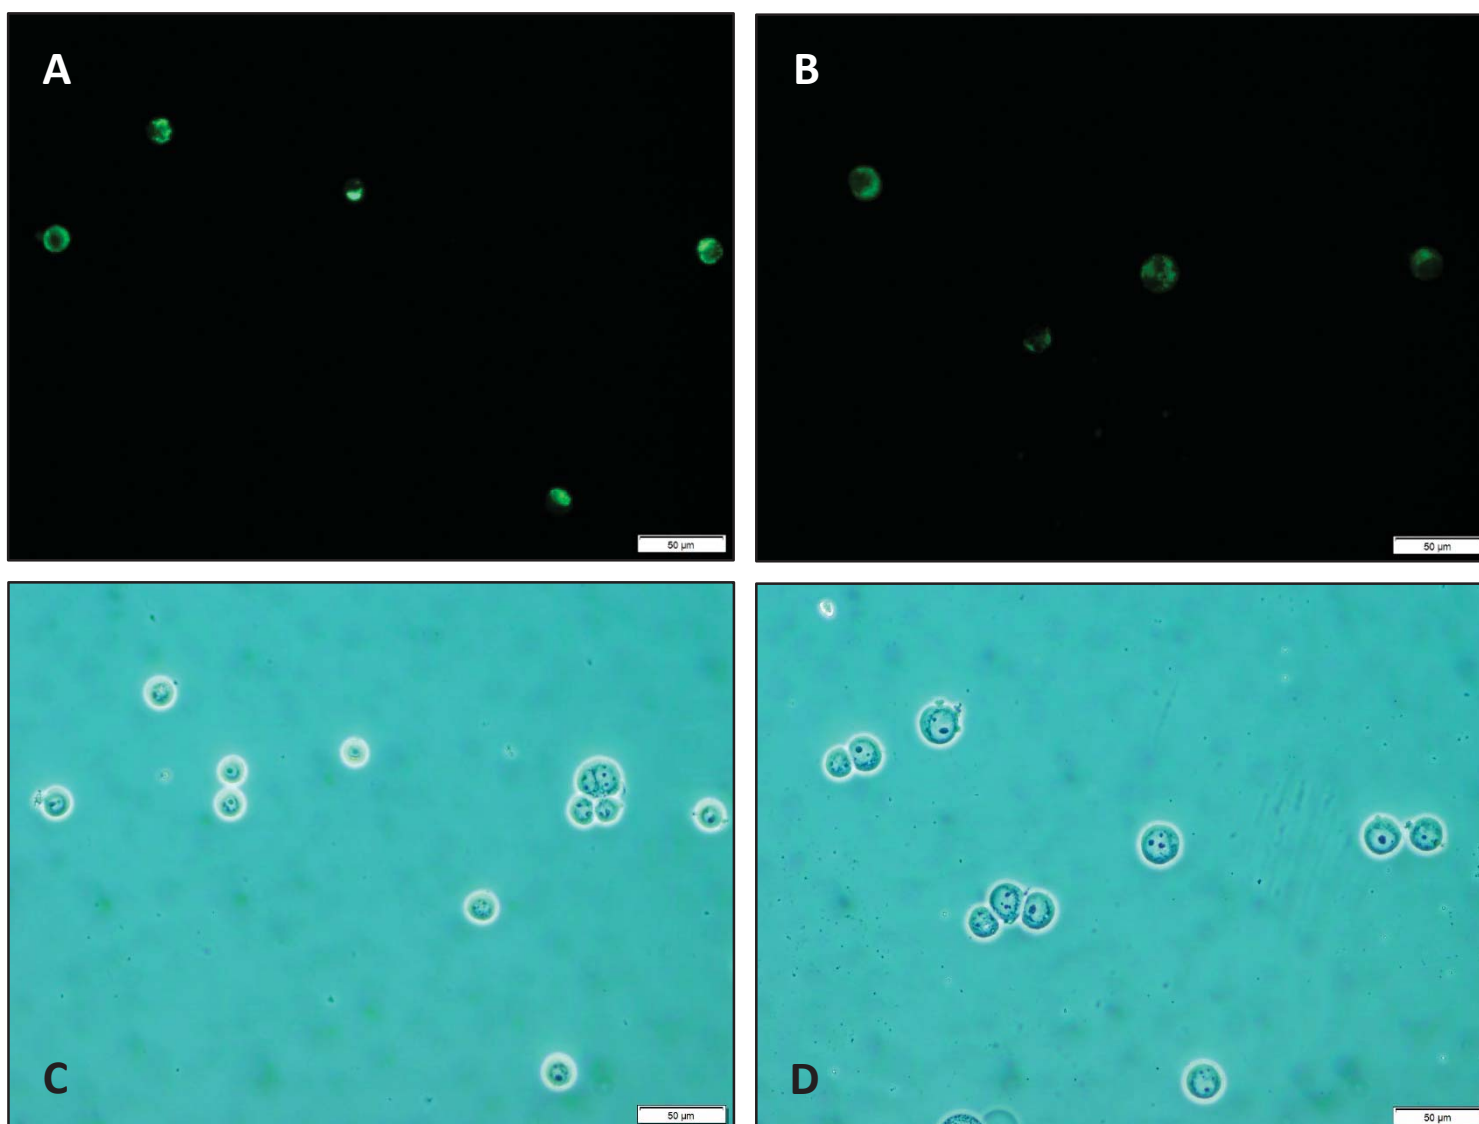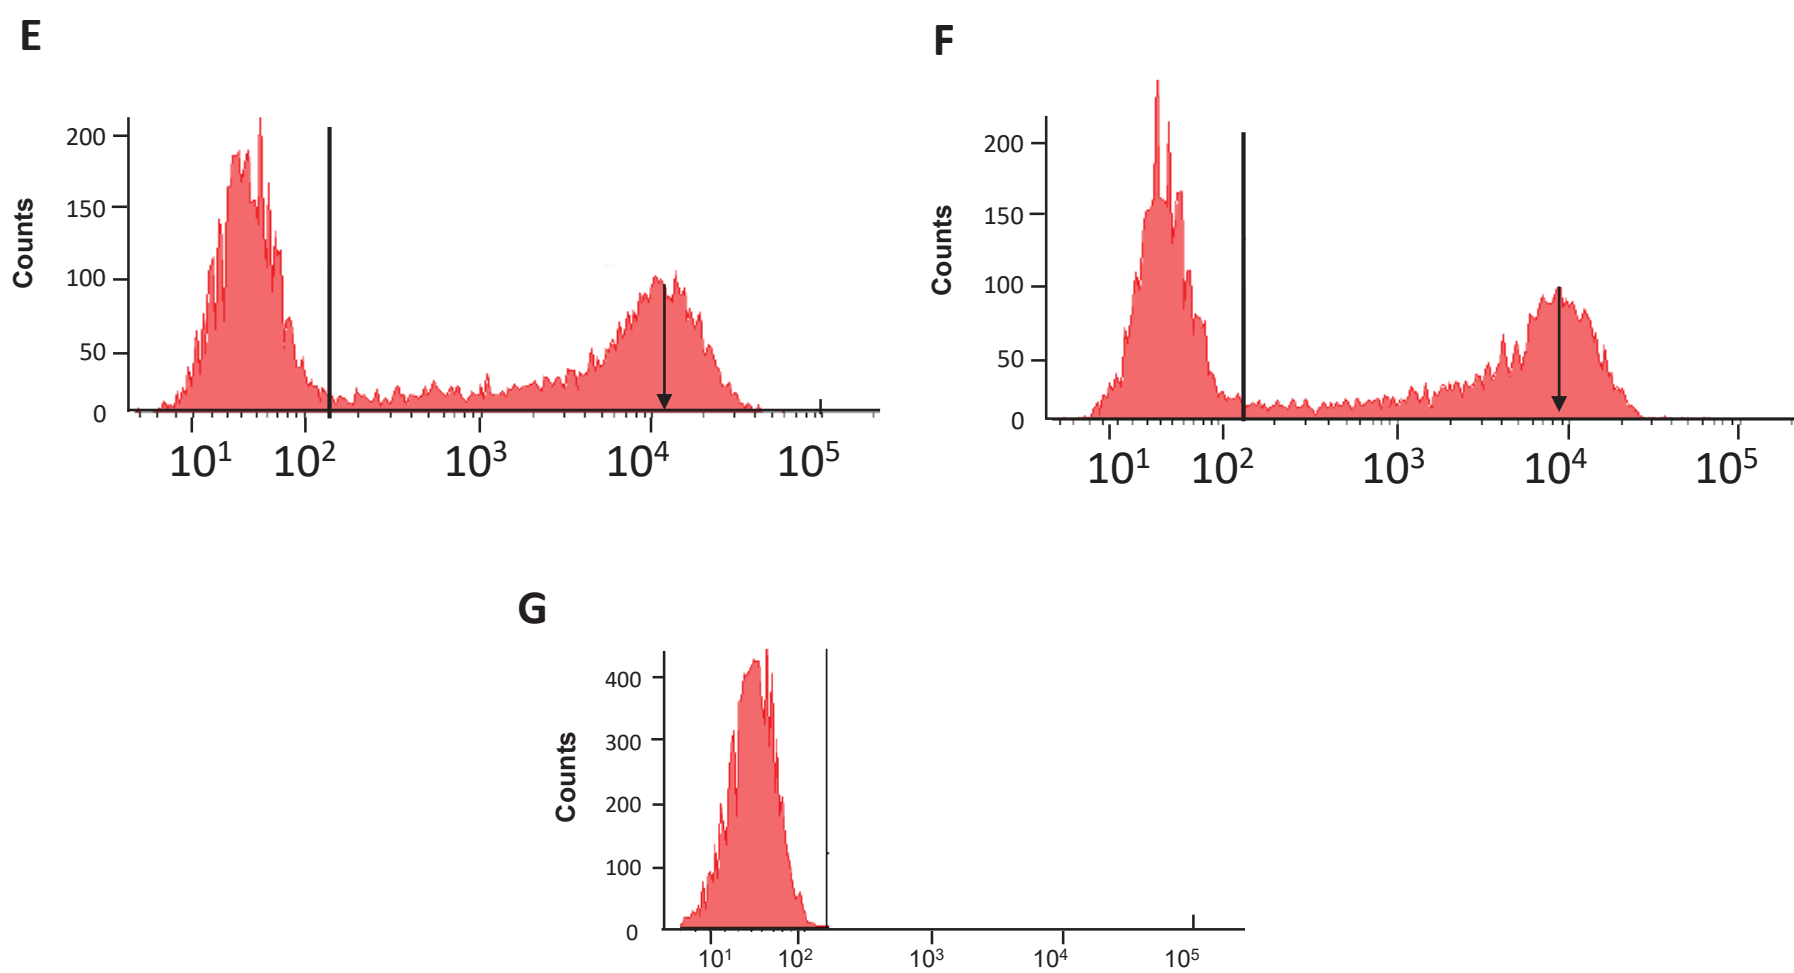

Fig. 9

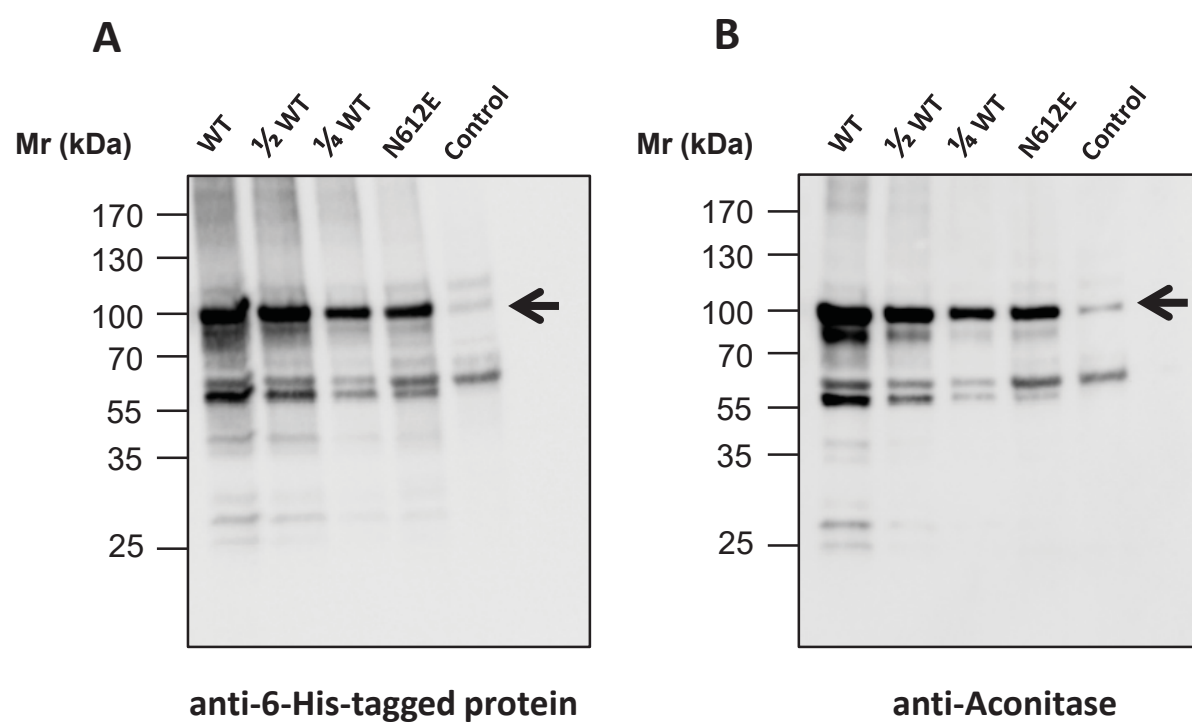

Fig. 10

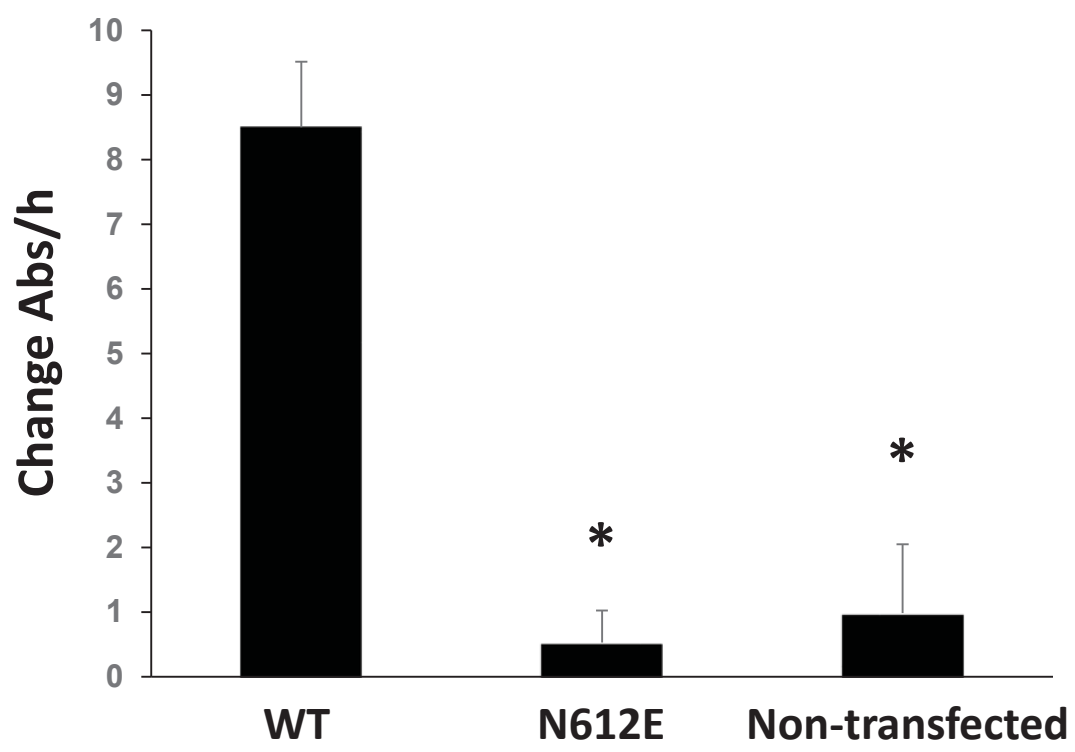

A)

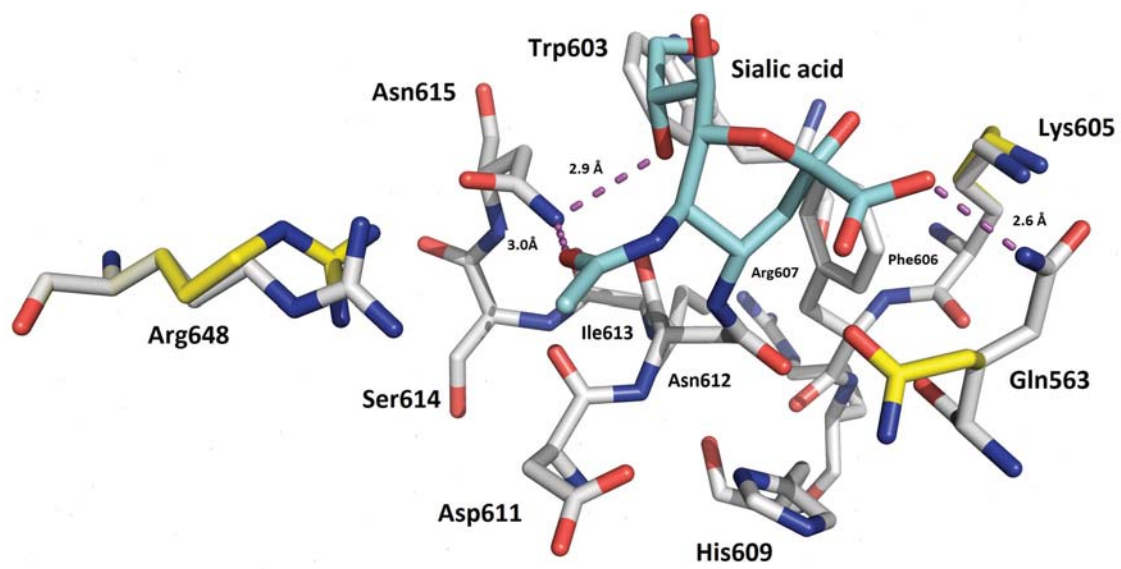

B)

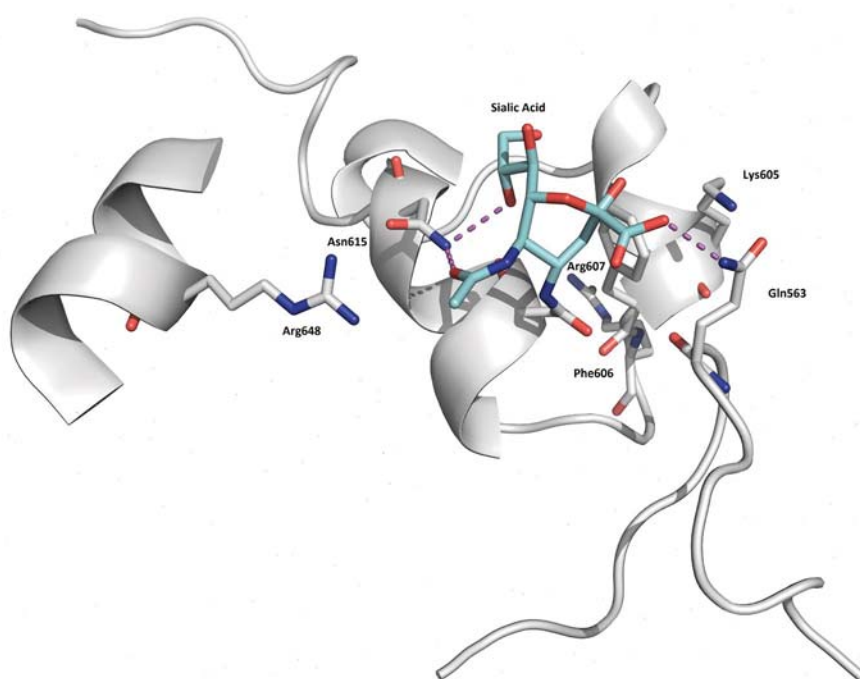

Source: https://biorxiv.org/content/10.1101/2020.04.28.067298v1.full.pdf
